# Supplementary material for: TNF drives aberrant BMP signaling to induce endothelial and mesenchymal dysregulation in pulmonary hypertension
Source: JCI journal article supplement (doi:10.1172/jci.insight.174456), 2025-06-26
Supplement: sd1 [file 1]

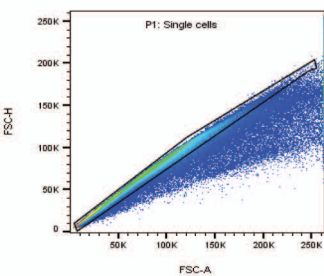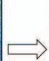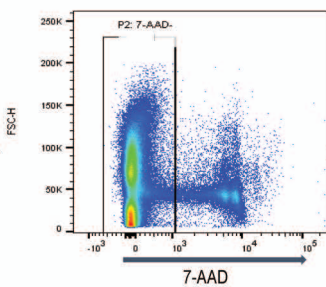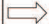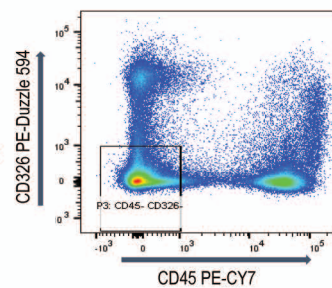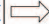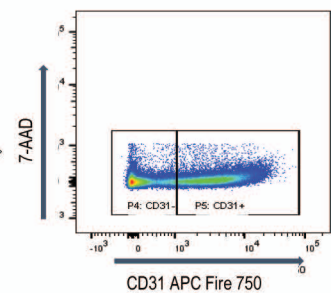

**Supplemental Figure 1. Gating strategy to generate non-hematopoietic, non-epithelial pulmonary single cells by flow cytometry.** Gates shown include single cells (P1), viable cells (P2), non-epithelial cells (CD326<sup>-</sup>) and non-leukocyte (CD45<sup>-</sup>) cells (P3), CD31<sup>-</sup> (P4) and CD31<sup>+</sup> (P5).

A.

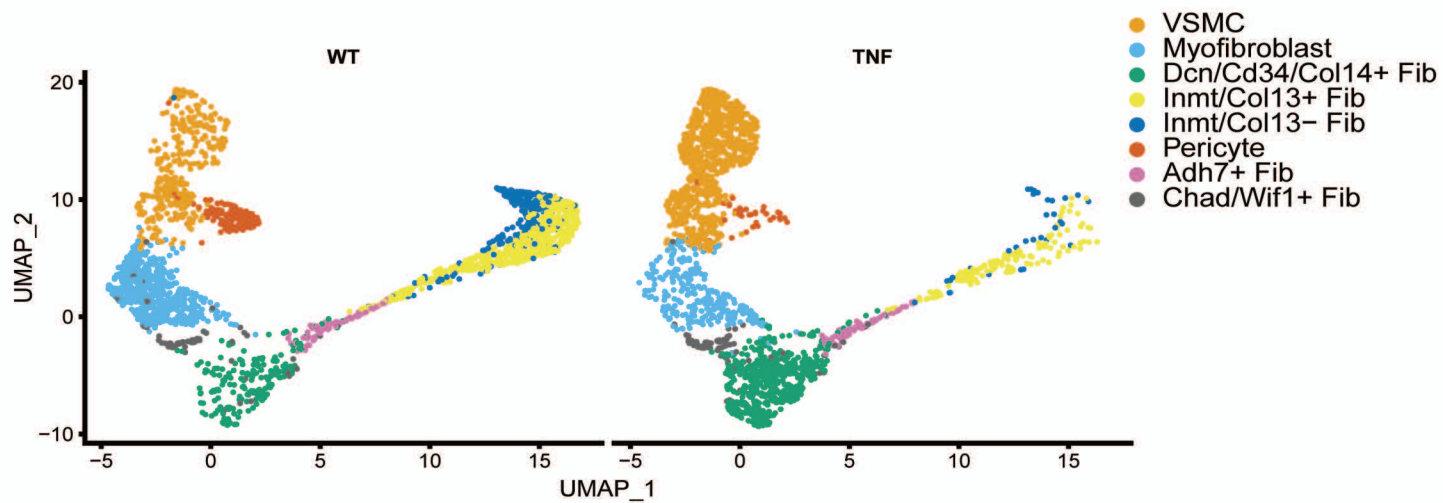

B.

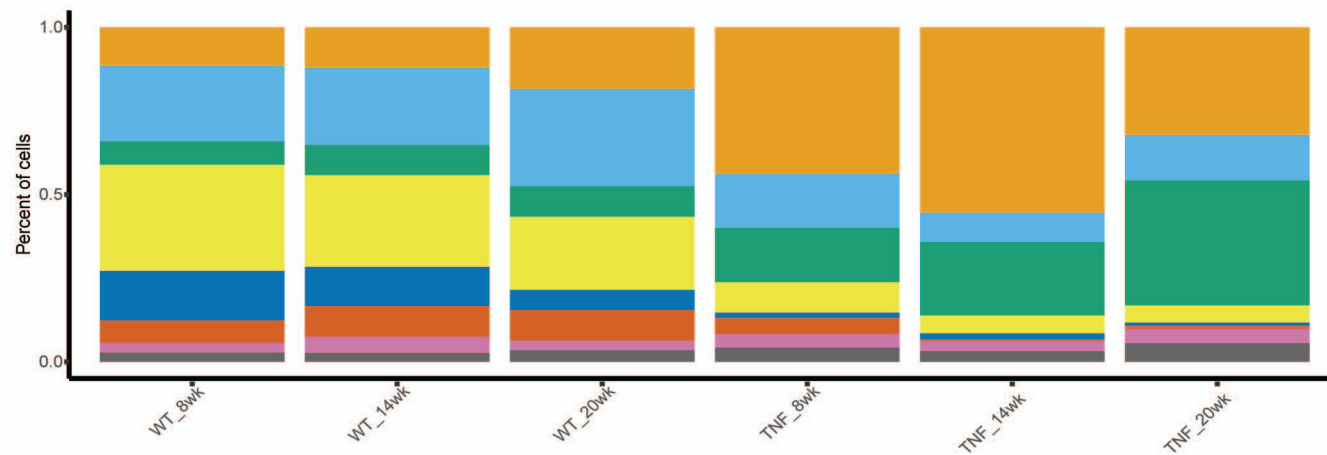

C.

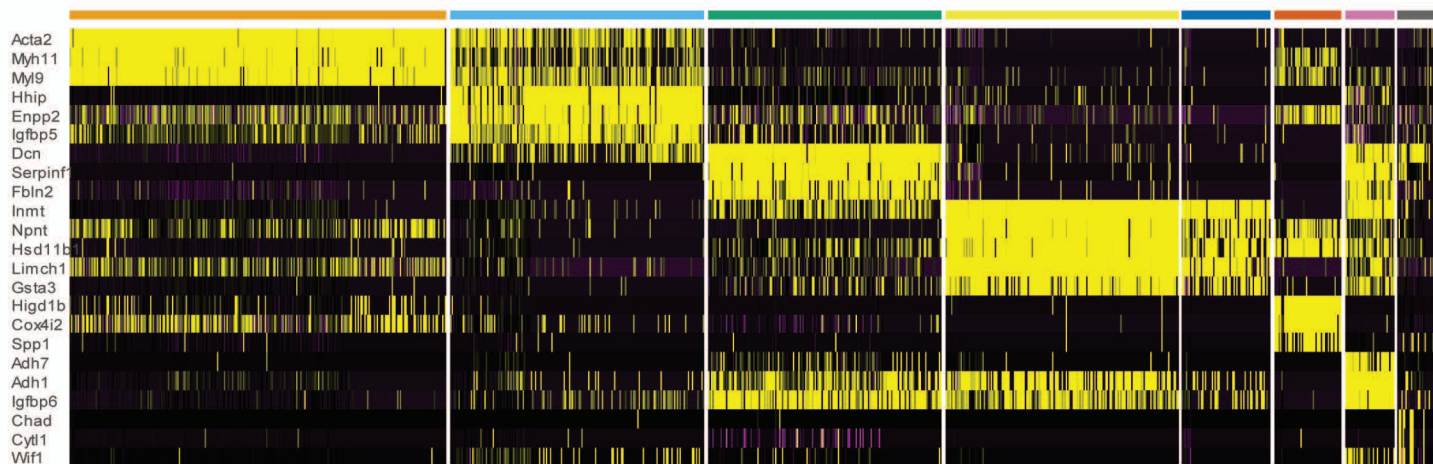

**Supplemental Figure 2. Reclustering of mesenchymal cells identifies additional fibroblast subsets.** A. UMAP projection of resclustering of mesenchymal cells identifies that Col14<sup>+</sup> fibroblasts include both DCN/CD34/Col14<sup>+</sup> cells and Chad/Wif1<sup>+</sup> fibroblast sub-populations while Col13<sup>+</sup> fibroblasts are made of clusters including Inmt<sup>+</sup>/Col13<sup>+</sup>, Inmt<sup>+</sup>/Col13<sup>-</sup>, and Adh7<sup>+</sup> sub-populations. B. Stacked bar plots indicating the relative proportion of cells of each mesenchymal subtype in each condition. C. Heatmap indicating top 3 genes differentiating each cluster.

A.

WT gene WT Regulon Merge  
(TF binding motif)

Gpihbp1 Mafb\_ext Merge

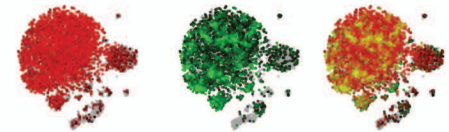

Emp2 Prdm1\_ext Merge

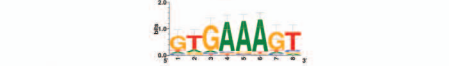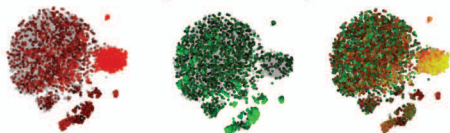

Vwf Gata6\_ext Merge

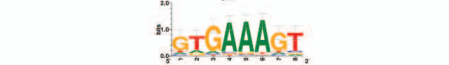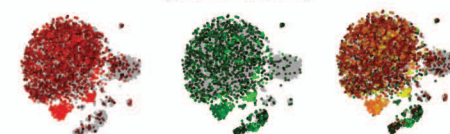

Col13a1 Tcf21\_ext Merge

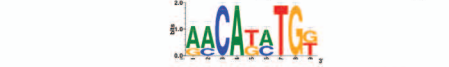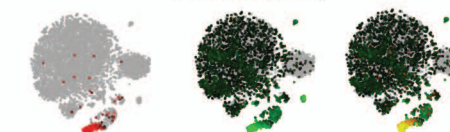

Hhip Prdm6 Merge

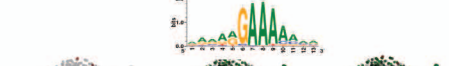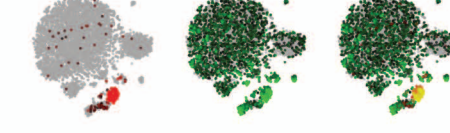

Cspg4 Ebf1\_ext Merge

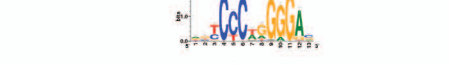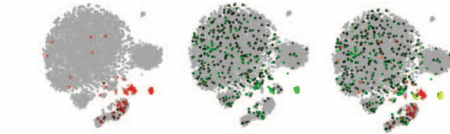

B.

TNF gene TNF Regulon Merge  
(TF binding motif)

Gpihbp1 Runx1 Merge

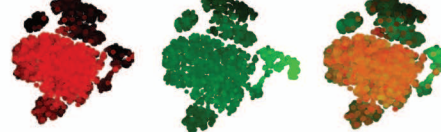

Emp2 Etv1\_ext Merge

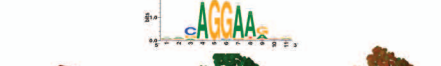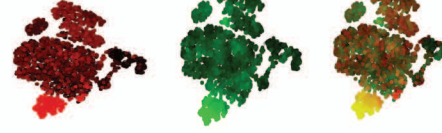

Vwf Foxc1 Merge

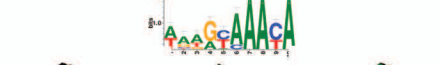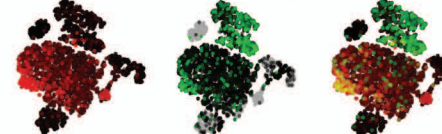

Inmt Twist1 Merge

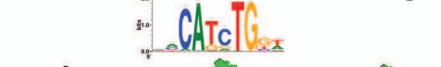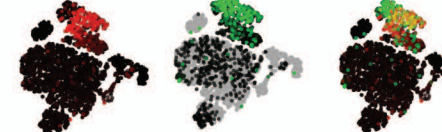

Acta2 Prdm6 Merge

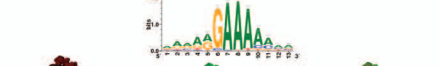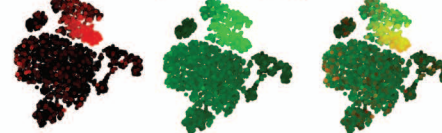

Msln Wt1 Merge

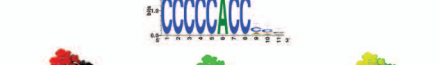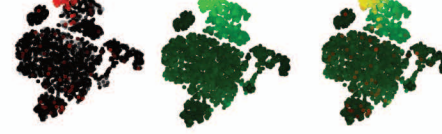

TNF Regulon Pathways

Runx1 (n = 32 genes)

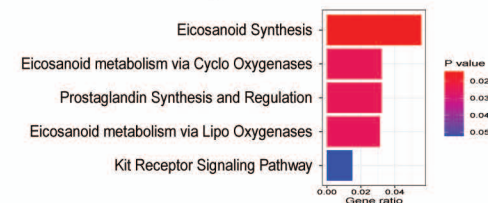

Etv1\_ext (n = 11 genes)

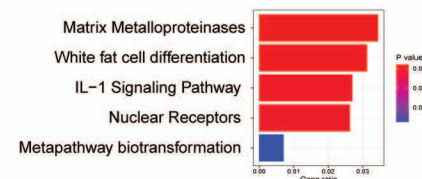

Foxc1 (n = 26 genes)

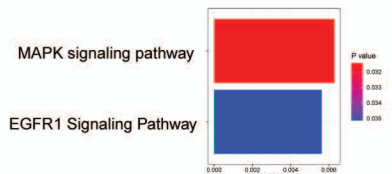

Twist1 (n = 57 genes)

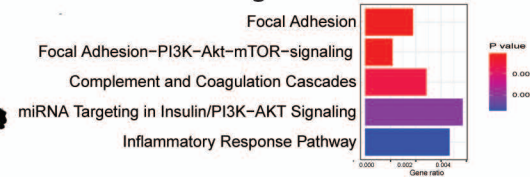

Prdm6 (n = 78 genes)

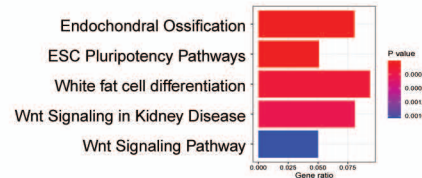

Wt1 (n = 60 genes)

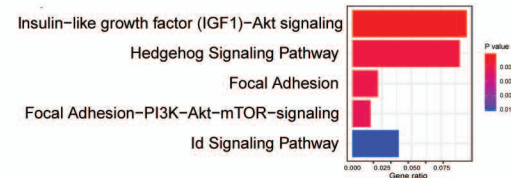

**Supplemental Figure 3. Identification of altered gene regulation and transcription factor binding in TNF-Tg cells using the SCENIC pipeline.** A. t-SNE plots indicate the distribution of expression of markers of cell populations (red, left), regulons (green, center), and merged (right, yellow indicating co-expression of the cell identity marker and the regulon) for six regulons which are present predominantly in WT (left panel) and only in TNF (right panel). Each regulon is characterized by transcription factor binding indicated by the name of the regulon and the binding motif indicated under this name. B. Differentially regulated pathways defined by the genes in each of the regulons which were found in TNF-Tg but not WT lungs

A.

■ spliced ■ unspliced

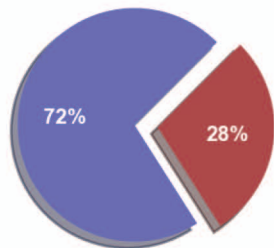

■ spliced ■ unspliced

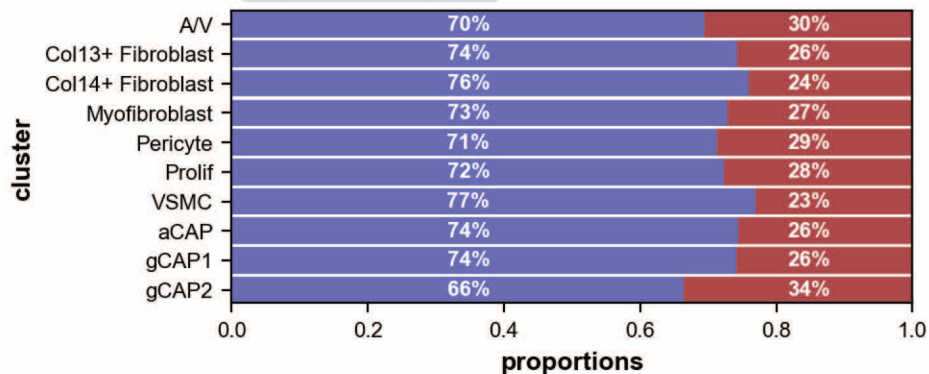

B.

■ spliced ■ unspliced

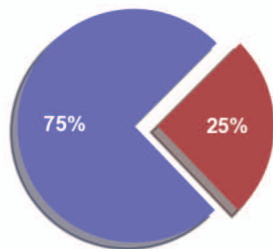

■ spliced ■ unspliced

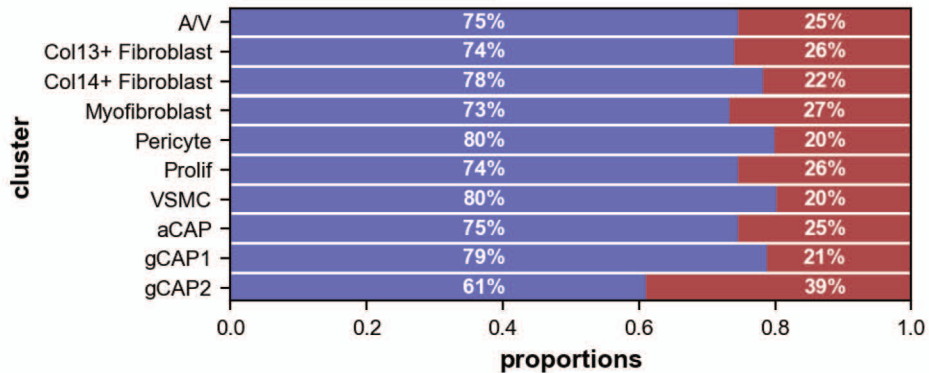

**Supplemental Figure 4. Differential mRNA splicing across condition and cell types.** Percentage of spliced and unspliced transcripts calculated by velocity in A. WT and B. TNF-Tg lungs. All cells are shown in pie charts (left) while proportions of splicing in each cellular subset are shown in bar charts (right).

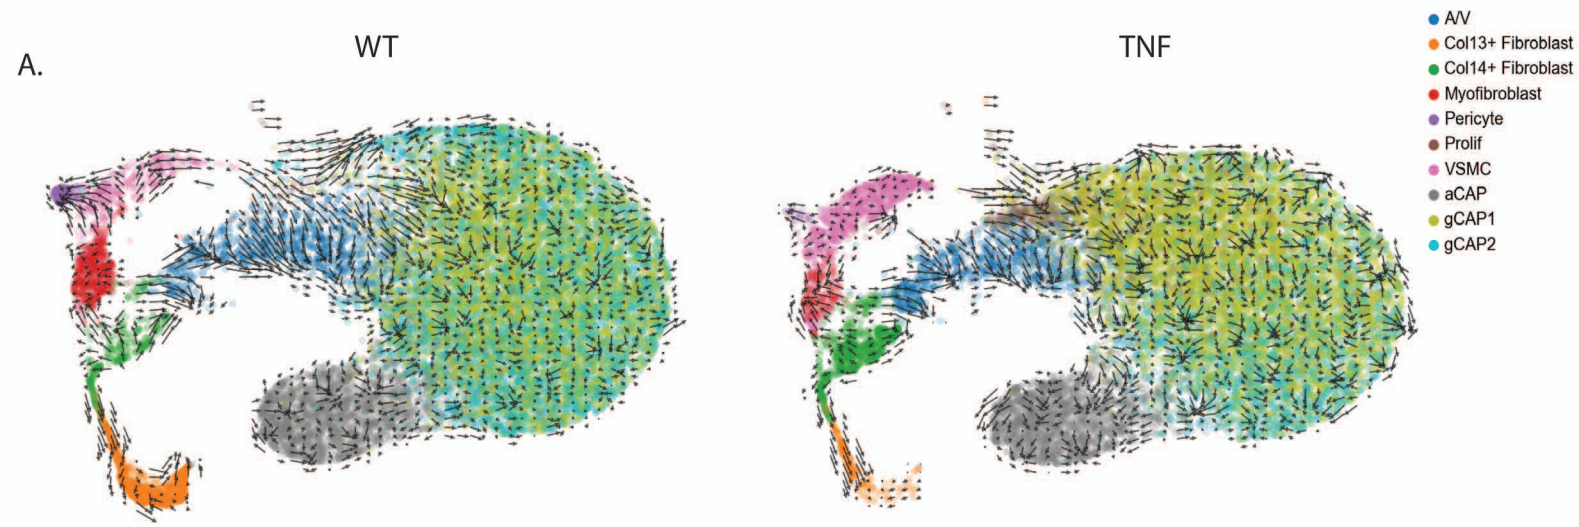

**B. Fibroblast**

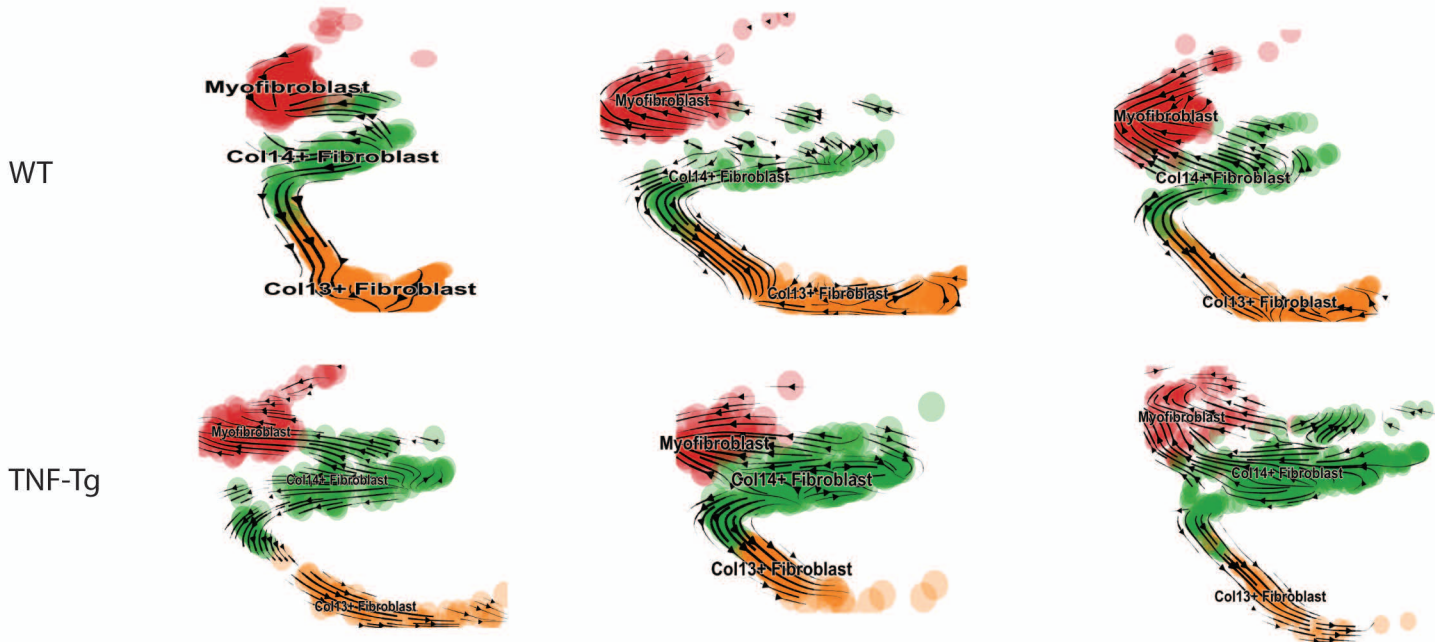

**C. Mural**

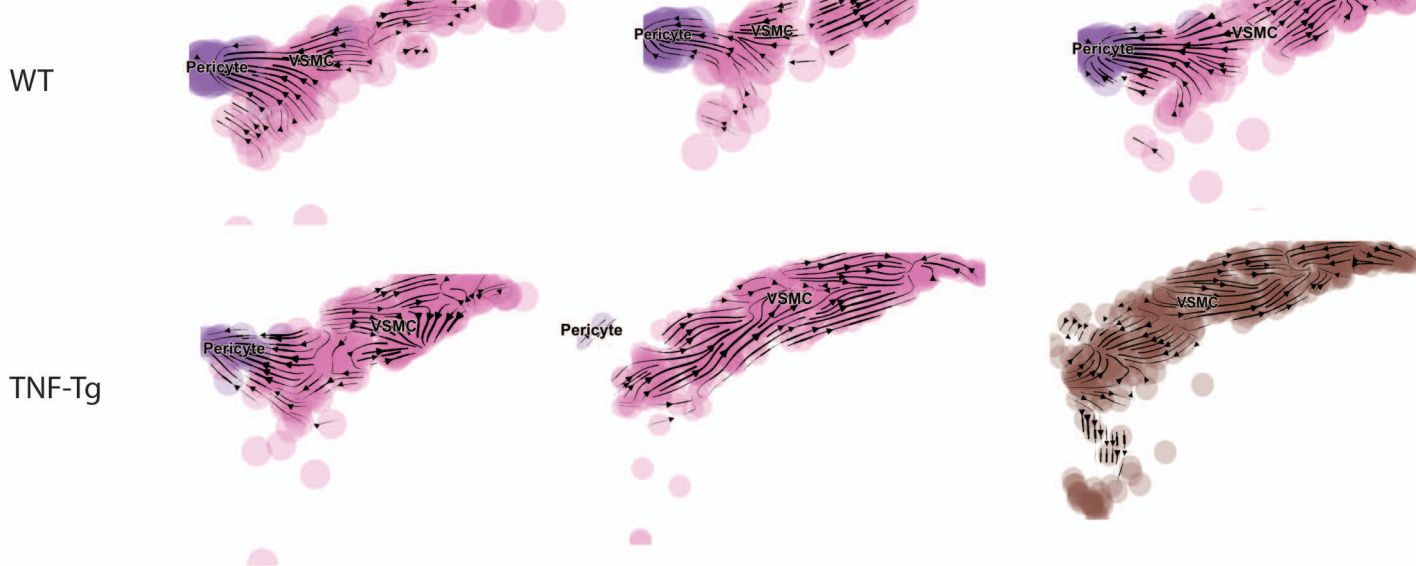

**Supplemental Figure 5. RNA velocity in endothelial, fibroblast, and mural cell subset over time.**

**Velocities were projected onto UMAP** embeddings with arrows indicating direction and relative velocity were generated in A. endothelial B. fibroblast and C. mural cells using scVelo. In each cell condition, separate velocity embeddings were generated for WT (upper) and TNF-Tg (lower) conditions at 8 weeks (left), 14 weeks (center), and 20 weeks (right).

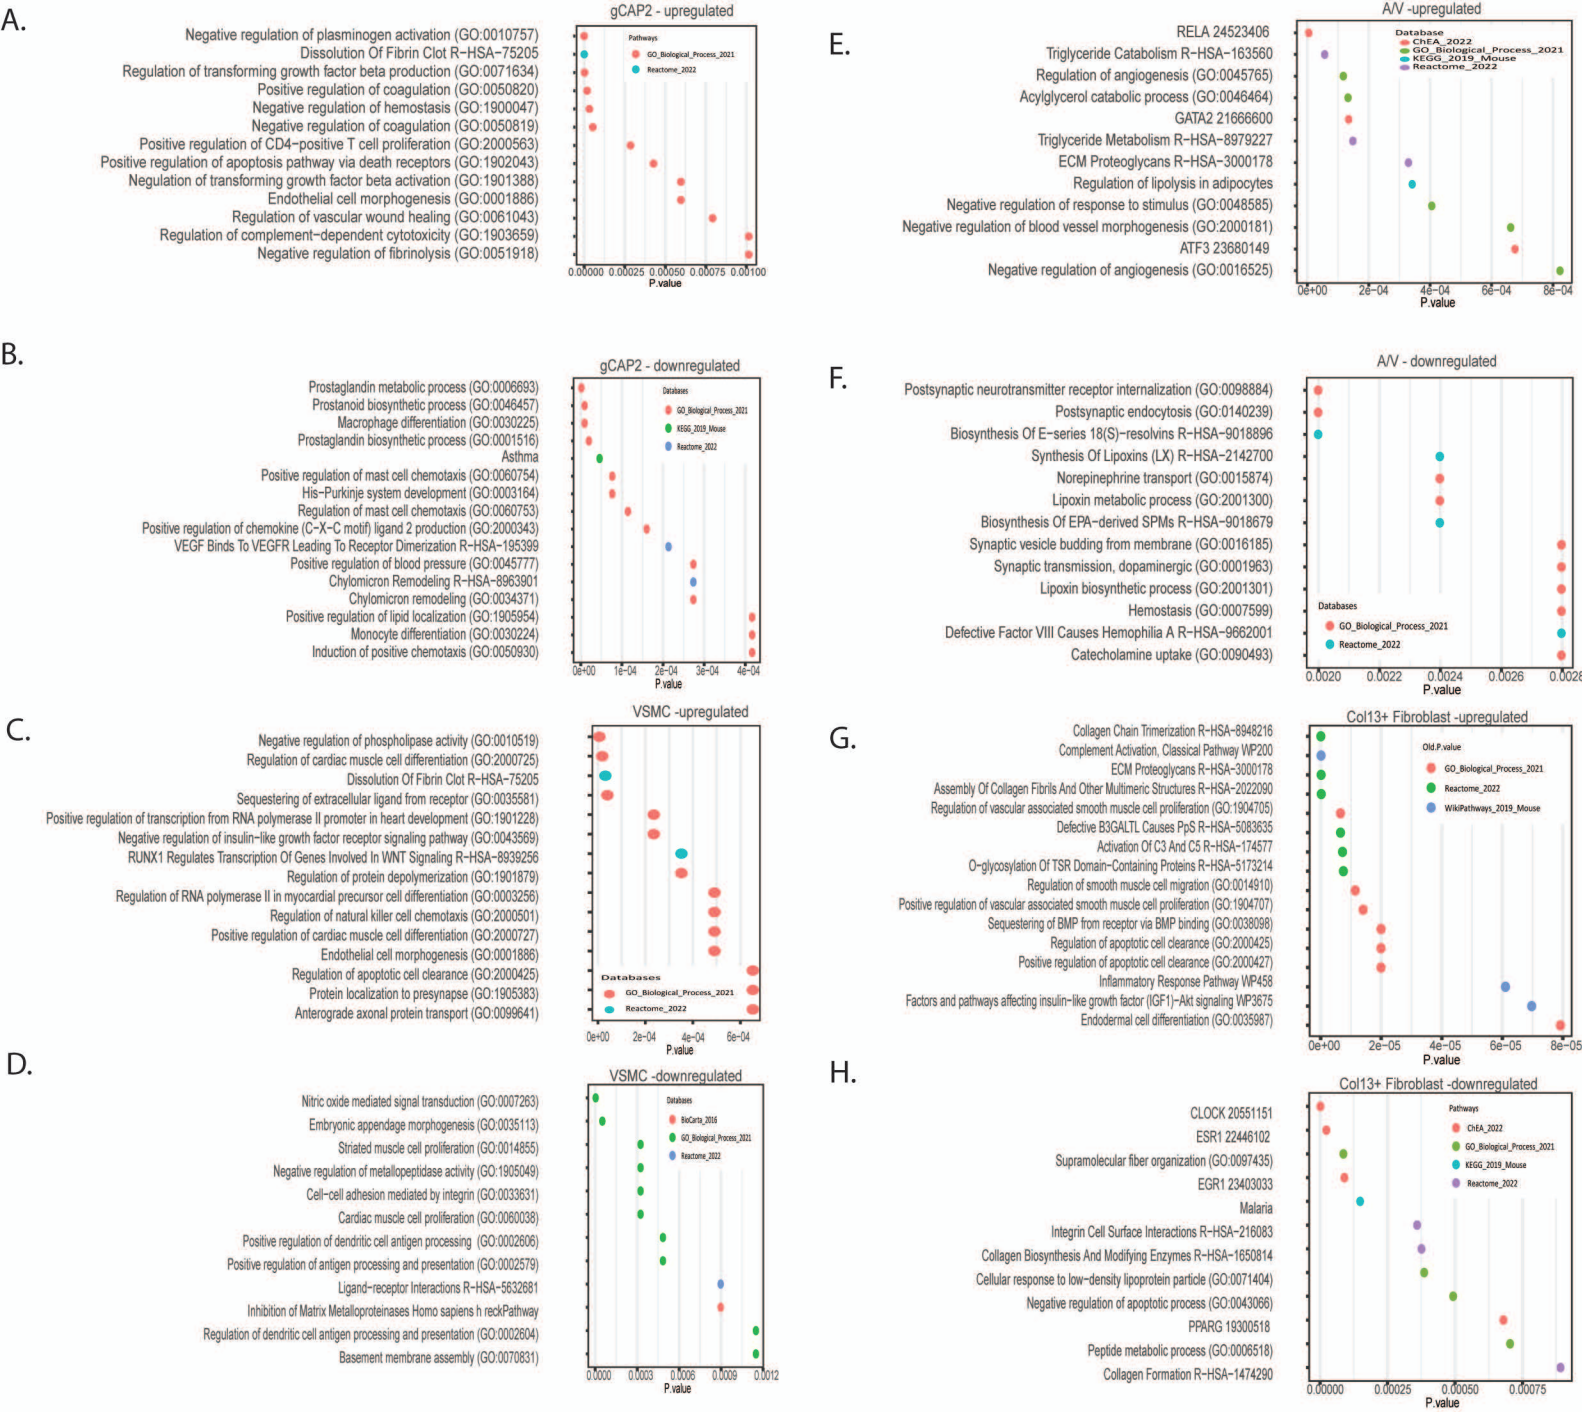

**Supplemental Figure 6. Up-regulated and down-regulated pathways in selected cell types.** More granular pathway analysis of cells from volcano plots in Figure 4 was performed in (A-B) gCAP2 cells, (C-D) vascular smooth muscle cells, (E-F) arterial/venous endothelial cells, and (G-H) collagen 13+ fibroblasts using the enrichR package. Up-regulated (A,C,E,G) and down-regulated (B,D,F,H) pathways in TNF vs WT cells are demonstrated by Cleveland dot plots with colors indicating the database where pathway annotation was derived and x-axis indicating significance (p-value) of over-representation of each specified pathway

## A. gCAP1

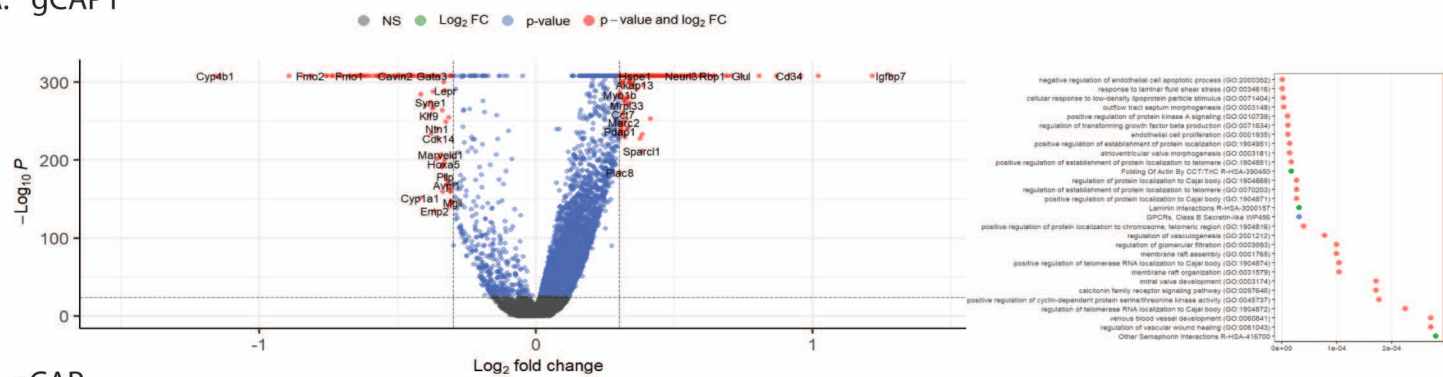

## B. aCAP

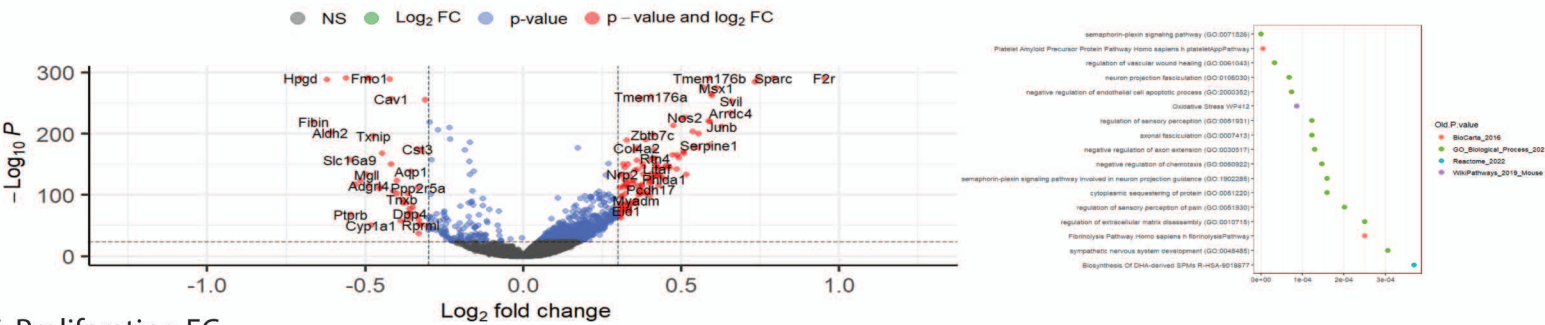

## C. Proliferating EC

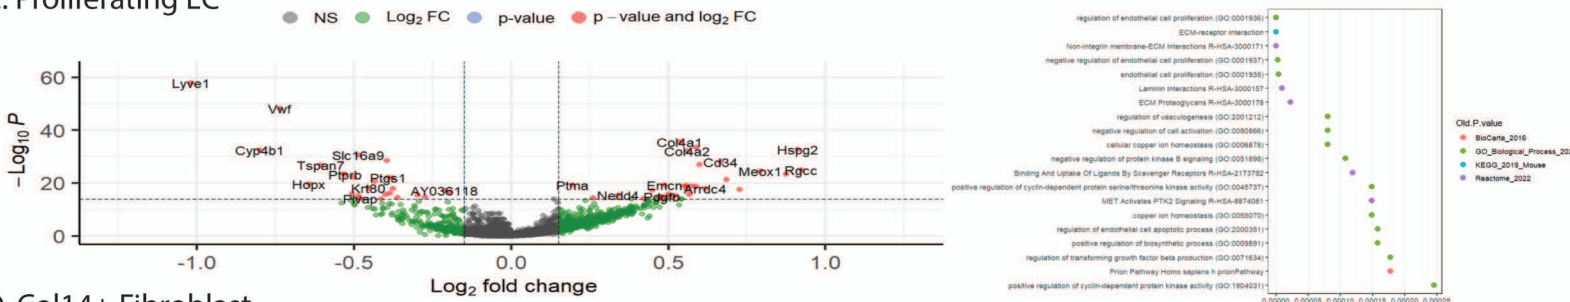

## D. Col14+ Fibroblast

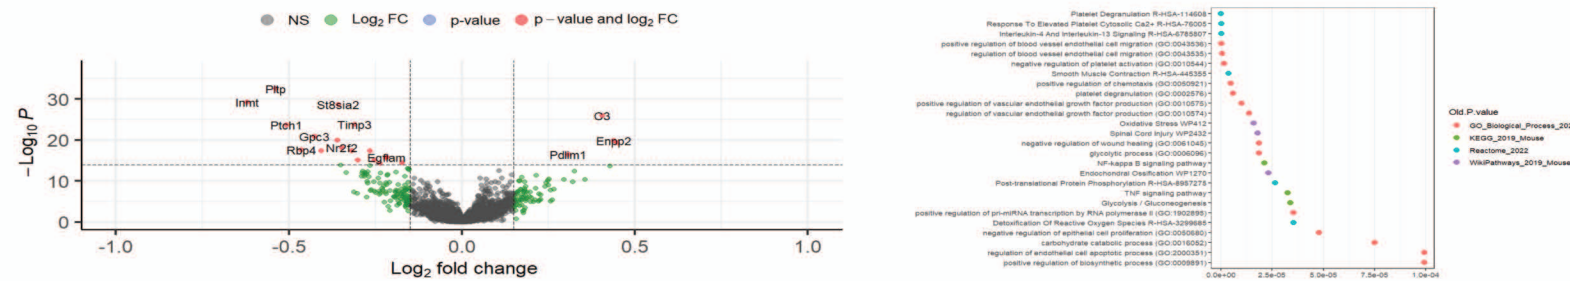

## E. Myofibroblast

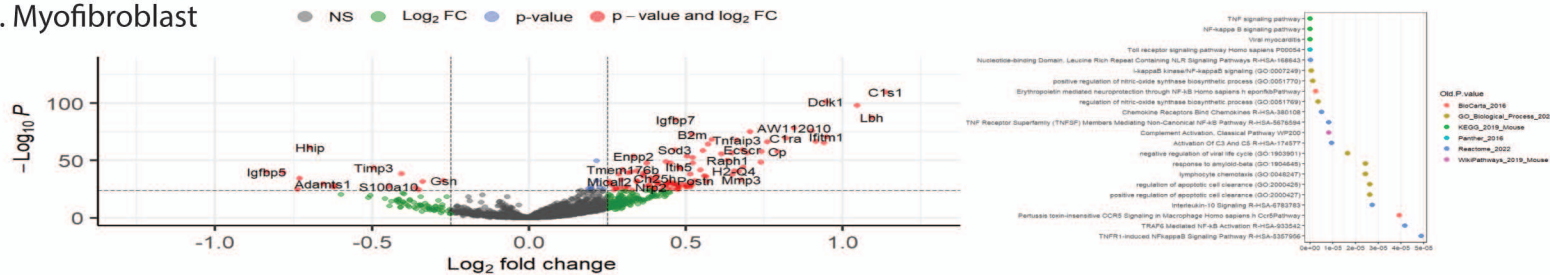

## F. Pericyte

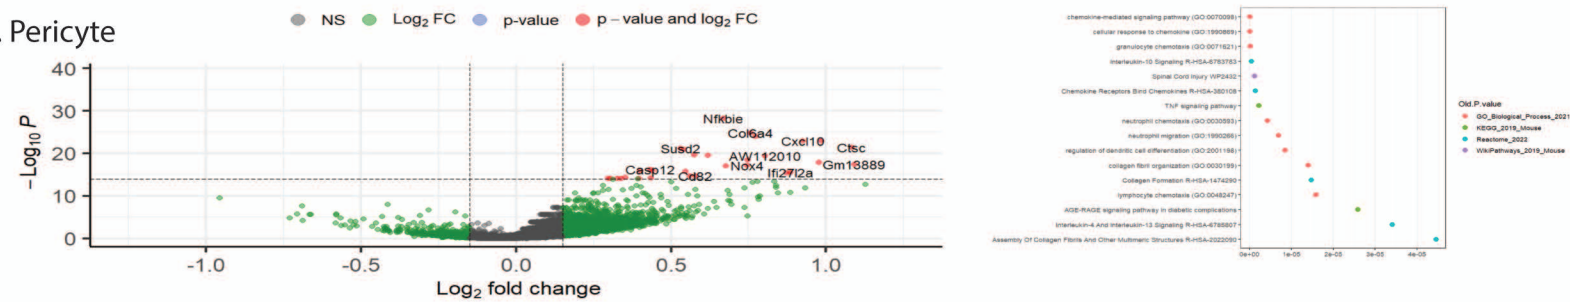

**Supplemental Figure 7. Differential gene expression in additional endothelial and mesenchymal cell populations.** Volcano plots (left) demonstrate genes which are most differentially over and under expressed in TNF vs WT mice in (A) gCAP1 cells, (B) aCAP cells, (C) proliferating EC cells, (D) collagen 14+ fibroblasts, (E) Myofibroblasts, and (F) Pericytes. Differentially regulated pathways in TNF vs WT cells are demonstrated by Cleveland dot plots (right) with colors indicating the database where pathway annotation was derived and x-axis indicating significance (p-value) of over-representation of the pathway in each cell population

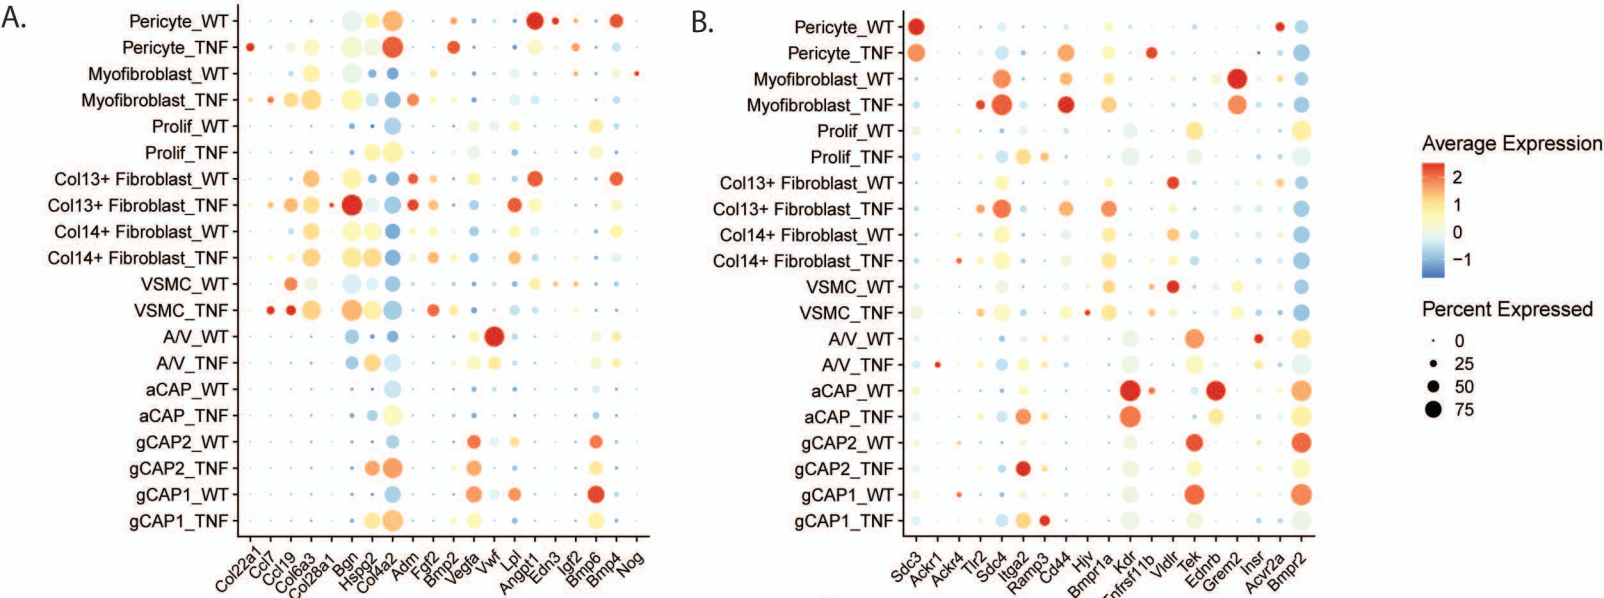

**C.**

| Ligand | Receptor  | Sender            | Receiver          | Score    |
|--------|-----------|-------------------|-------------------|----------|
| Nog    | Bmpr2     | Myofibroblast     | gCAP2             | 0.974955 |
| Nog    | Bmpr2     | Myofibroblast     | gCAP1             | 0.9717   |
| Bmp4   | Acvr2a    | Col13+ Fibroblast | Col13+ Fibroblast | 0.963599 |
| Bmp6   | Bmpr2     | gCAP1             | gCAP2             | 0.963371 |
| Bmp6   | Bmpr2     | gCAP1             | gCAP1             | 0.96232  |
| Bmp4   | Bmpr2     | Col13+ Fibroblast | gCAP2             | 0.961405 |
| Igf2   | Insr      | Myofibroblast     | A/V               | 0.959702 |
| Bmp4   | Bmpr2     | Col13+ Fibroblast | gCAP1             | 0.95815  |
| Bmp4   | Grem2     | Col13+ Fibroblast | Myofibroblast     | 0.957198 |
| Bmp6   | Bmpr2     | gCAP2             | gCAP2             | 0.955055 |
| Bmp6   | Bmpr2     | gCAP2             | gCAP1             | 0.954004 |
| Edn3   | Ednrb     | VSMC              | aCAP              | 0.953497 |
| Bmp4   | Acvr2a    | Col13+ Fibroblast | Myofibroblast     | 0.948611 |
| Angpt1 | Tek       | Col13+ Fibroblast | A/V               | 0.948205 |
| Lpl    | Vldlr     | gCAP1             | VSMC              | 0.946577 |
| Angpt1 | Tek       | Col13+ Fibroblast | gCAP2             | 0.943602 |
| Lpl    | Vldlr     | gCAP2             | VSMC              | 0.941858 |
| Vwfr   | Tnfrsf11b | A/V               | aCAP              | 0.941408 |
| Bmp4   | Acvr2a    | Col14+ Fibroblast | Col13+ Fibroblast | 0.941298 |
| Vegfa  | Kdr       | gCAP1             | aCAP              | 0.941177 |
| Vegfa  | Nrp1      | gCAP1             | aCAP              | 0.939263 |
| Bmp4   | Bmpr2     | Col14+ Fibroblast | gCAP2             | 0.939104 |
| Nog    | Bmpr2     | Myofibroblast     | A/V               | 0.936615 |
| Angpt1 | Tek       | VSMC              | A/V               | 0.93634  |
| Bmp4   | Acvr1     | Col13+ Fibroblast | Myofibroblast     | 0.936154 |
| Nog    | Bmpr2     | Myofibroblast     | aCAP              | 0.935992 |
| Bmp4   | Bmpr2     | Col14+ Fibroblast | gCAP1             | 0.935849 |
| Gpc3   | Flt1      | Col14+ Fibroblast | gCAP2             | 0.935479 |
| Fgf2   | Fgfr4     | Myofibroblast     | Col13+ Fibroblast | 0.935387 |
| Fgf1   | Fgfr4     | aCAP              | Col13+ Fibroblast | 0.935123 |
| Bmp4   | Grem2     | Col14+ Fibroblast | Myofibroblast     | 0.934896 |
| Bmp7   | Bmpr2     | Col14+ Fibroblast | gCAP2             | 0.93467  |
| Vegfa  | Kdr       | Col13+ Fibroblast | aCAP              | 0.934104 |
| Fgf7   | Nrp1      | Myofibroblast     | aCAP              | 0.93291  |
| Vegfa  | Nrp1      | Col13+ Fibroblast | aCAP              | 0.93219  |
| Angpt1 | Tek       | VSMC              | gCAP2             | 0.931737 |
| Bmp6   | Acvr2a    | gCAP1             | Col13+ Fibroblast | 0.931162 |
| Bmp7   | Bmpr2     | Col14+ Fibroblast | gCAP1             | 0.930387 |
| Vegfa  | Gpc1      | gCAP1             | Col13+ Fibroblast | 0.930347 |
| Efna1  | Epha1     | A/V               | Col13+ Fibroblast | 0.929029 |

**D.**

| Ligand  | Receptor | Sender            | Receiver          | Score    |
|---------|----------|-------------------|-------------------|----------|
| Bmp2    | Bmpr1a   | gCAP2             | Col13+ Fibroblast | 0.975143 |
| Bmp2    | Hjv      | gCAP2             | VSMC              | 0.973179 |
| Bmp2    | Bmpr1a   | gCAP1             | Col13+ Fibroblast | 0.972076 |
| Bmp2    | Hjv      | gCAP1             | VSMC              | 0.970113 |
| Fgf2    | Cd44     | VSMC              | Col13+ Fibroblast | 0.968956 |
| Adm     | Ramp3    | Myofibroblast     | gCAP1             | 0.967932 |
| Col4a2  | Itga2    | gCAP2             | gCAP2             | 0.958641 |
| Bmp2    | Bmpr1a   | A/V               | Col13+ Fibroblast | 0.957349 |
| Fgf2    | Cd44     | Col14+ Fibroblast | Col13+ Fibroblast | 0.956086 |
| Bmp2    | Bmpr1a   | Prolif            | Col13+ Fibroblast | 0.955828 |
| Bmp2    | Hjv      | A/V               | VSMC              | 0.955385 |
| Bmp2    | Hjv      | Prolif            | VSMC              | 0.953864 |
| Bmp2    | Bmpr1a   | VSMC              | Col13+ Fibroblast | 0.95358  |
| Adm     | Ramp3    | Myofibroblast     | aCAP              | 0.953385 |
| Fgf2    | Sdc4     | VSMC              | Col13+ Fibroblast | 0.952542 |
| Hspg2   | Itga2    | gCAP2             | gCAP2             | 0.951834 |
| Bmp2    | Hjv      | VSMC              | VSMC              | 0.951617 |
| Bgn     | Tlr2     | Col13+ Fibroblast | Myofibroblast     | 0.950039 |
| Col4a2  | Itga2    | gCAP1             | gCAP2             | 0.949881 |
| Col28a1 | Itga2    | Col13+ Fibroblast | gCAP2             | 0.949281 |
| Bmp2    | Bmpr1a   | Col14+ Fibroblast | Col13+ Fibroblast | 0.946327 |
| Bgn     | Tlr2     | VSMC              | Myofibroblast     | 0.94497  |
| Bmp2    | Hjv      | Col14+ Fibroblast | VSMC              | 0.944364 |
| Col6a3  | Itga2    | VSMC              | gCAP2             | 0.943428 |
| Ccl19   | Ackr4    | Myofibroblast     | Col14+ Fibroblast | 0.94303  |
| Ccl19   | Ackr4    | Col13+ Fibroblast | Col14+ Fibroblast | 0.941953 |
| Ccl7    | Ackr1    | VSMC              | A/V               | 0.941076 |
| Fgf2    | Sdc3     | VSMC              | VSMC              | 0.940399 |
| Col22a1 | Itga2    | Myofibroblast     | gCAP2             | 0.940002 |
| Fgf2    | Sdc4     | Col14+ Fibroblast | Col13+ Fibroblast | 0.939672 |
| Hspg2   | Itga2    | gCAP1             | gCAP2             | 0.93967  |
| Tgfb1   | Itgb8    | aCAP              | Col13+ Fibroblast | 0.939069 |
| Hspg2   | Itga2    | Prolif            | gCAP2             | 0.93877  |
| Hspg2   | Itga2    | gCAP2             | Prolif            | 0.936813 |
| Sema3b  | Nrp2     | aCAP              | gCAP2             | 0.936532 |
| Col5a2  | Itga2    | Col13+ Fibroblast | gCAP2             | 0.935513 |
| Ccl7    | Ackr1    | Myofibroblast     | A/V               | 0.935292 |
| Hspg2   | Itga2    | A/V               | gCAP2             | 0.935096 |
| Bgn     | Tlr2     | Col13+ Fibroblast | Col13+ Fibroblast | 0.934898 |
| Adm     | Ramp3    | Myofibroblast     | gCAP2             | 0.934682 |

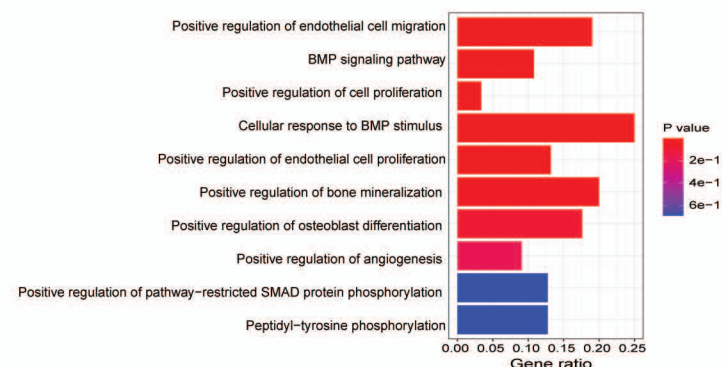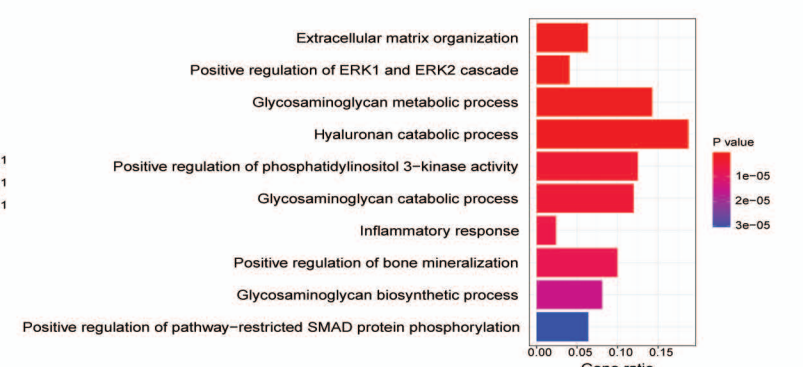

**Supplemental Figure 8.** Ligand-receptor analysis demonstrates prominent role of loss of BMP2 signaling in TNF mediated PAH. Differentially regulated ligands (A) and receptors (B) were identified across cell types by mulitnichenetr and are represented as dotplots. The top ligand-receptor pairs between two interacting cell types were scored according to probability and ranked in terms of differential regulation in TNF vs WT conditions with those down-regulated in TNF (or up in WT) shown in (C) and those up-regulated in TNF conditions shown in (D). Pathways indicated by upregulated L:R pairs are shown below



**Supplemental Figure 9. Ligand receptor interactions in key cell types in TNF-Tg PAH as senders and receivers.** Multinichenetr was used to visualize per sample the scaled product of ligand and receptor expression in (A) gCAP1 cells (B) A/V endothelial cells (C) VSMCs and (D) Col13+ Fibroblasts. Each cell types' interactions are represented both as senders (producers of ligands, left) as receivers (producers of receptors, right). Dot-plots (left) represent the predicted ligand-receptor interaction per genotype/condition in each pair of indicated cell types using pseudo-bulk expression. Heatmaps (right) indicating the scaled (left) and total (right) ligand activity are expressed for each ligand-receptor pair across WT and TNF-Tg conditions with colors used to indicate ligand activity.

Central

Peripheral

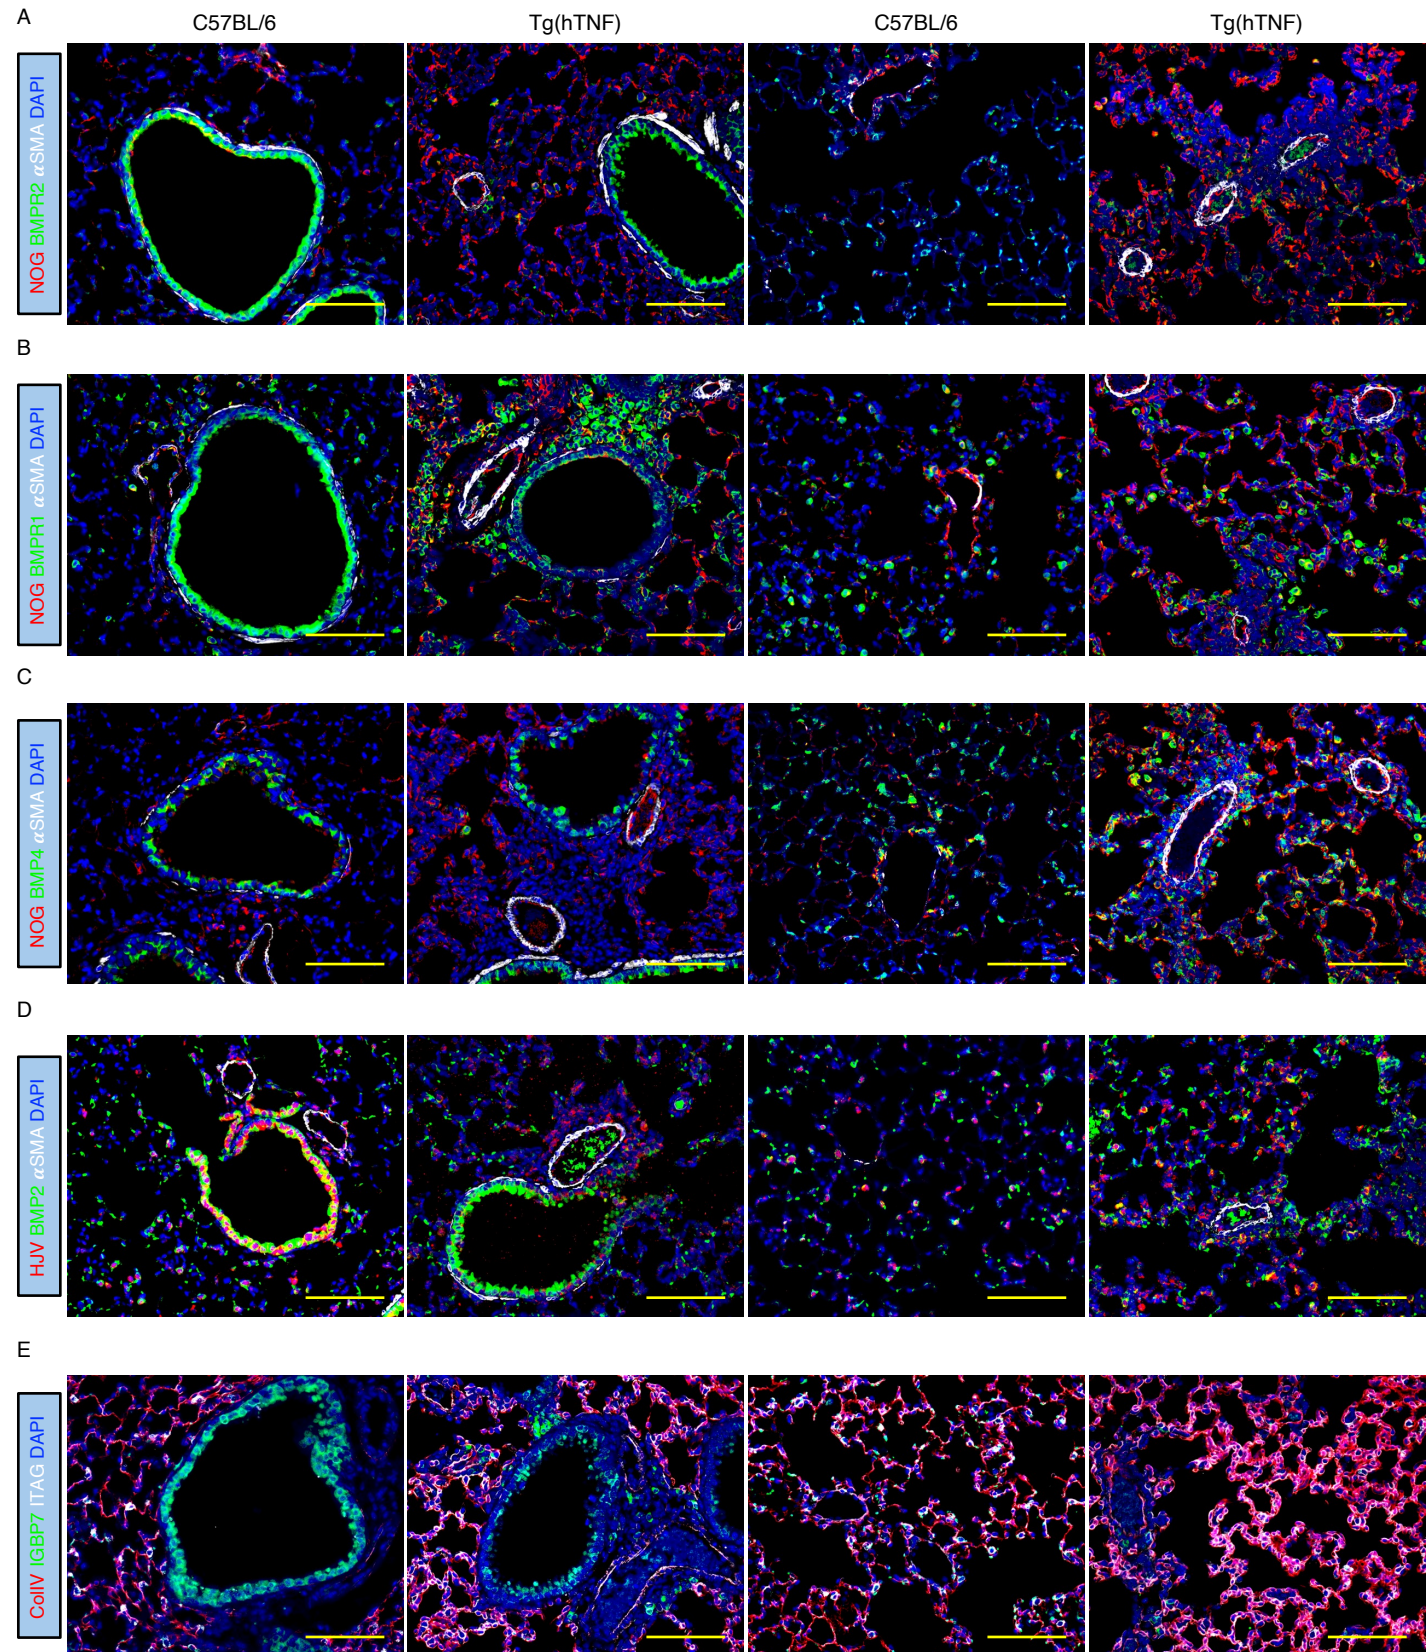

**Supplemental Figure10. Immunofluorescent co-staining of molecules from BMP and TGF-beta pathways in 8 week old WT and TNF-Tg mice.** Lungs from 8 week old mice (n=3 per condition) were collected and paraffin embedded and subsequently immunostaining was performed to colocalize relevant molecules and structures. BMP pathways were assessed in (A) with Bmpr2/Nog/aSMA, (B) with Bmpr1a/Nog/aSMA, (C) Bmp4/Nog/aSMA, and (D) Bmp2/Hjv/aSMA; TGF-beta/collagen pathway is indicated by (E) Igfbp7/Col4a1/Itga2 staining. In each instance colors are indicated in the inset titles above the images. Top rows for each stain indicate WT mice and bottom rows TNF-Tg mice. Images were taken at 20x magnification and represent central bronchiolar regions (left) and the lung periphery (right). Representative images

Nog

aSMA

Merged

TNF-  
8 week

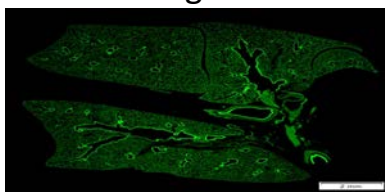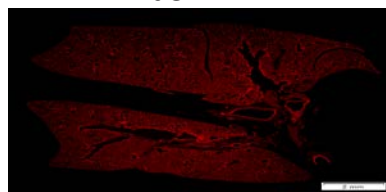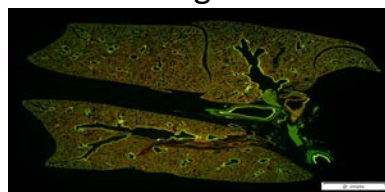

TNF+  
8 week

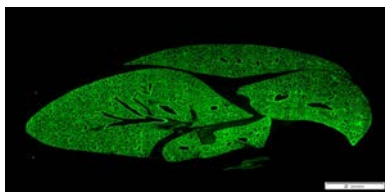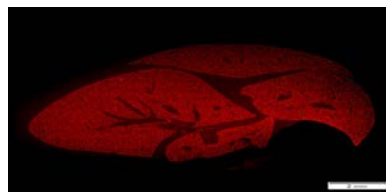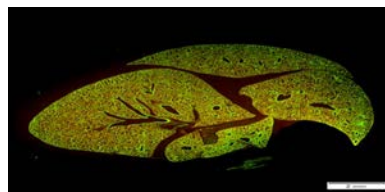

TNF-  
19 week

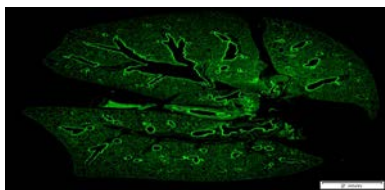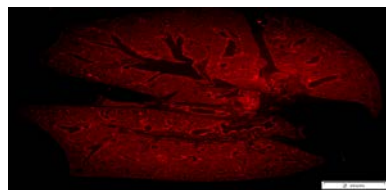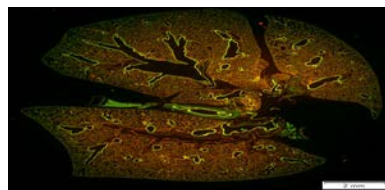

TNF+  
19 week

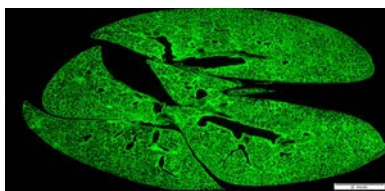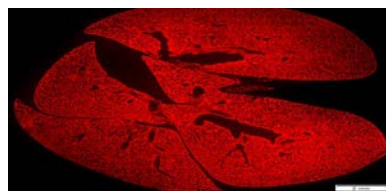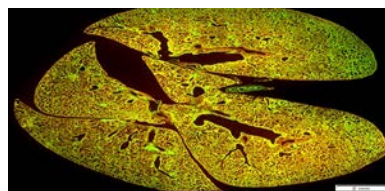

BMP2

BMPR2

HJV

TNF-  
8 week

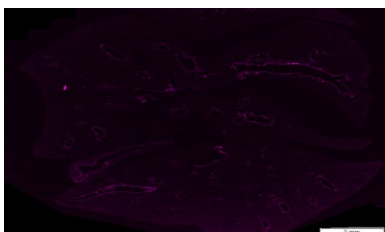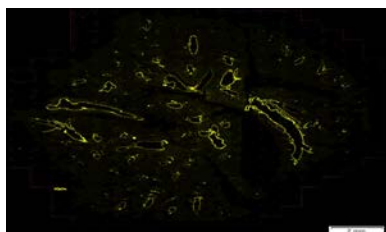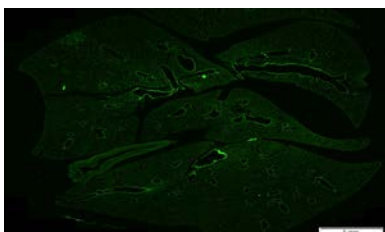

TNF+  
8 week

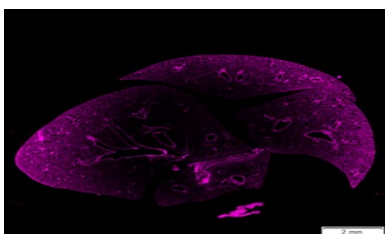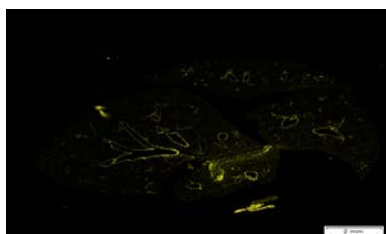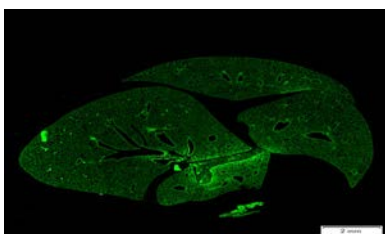

TNF-  
19 week

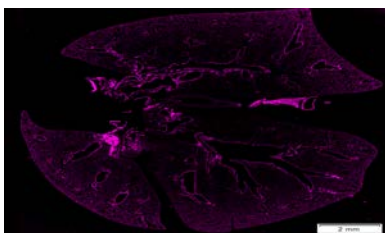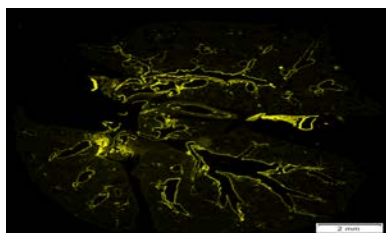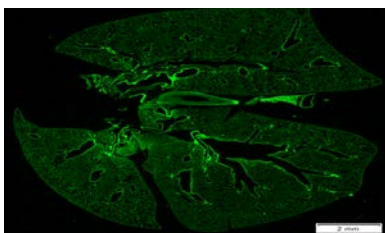

TNF+  
19 week

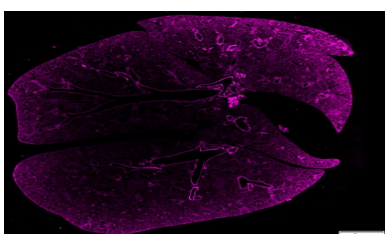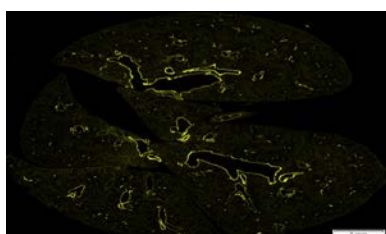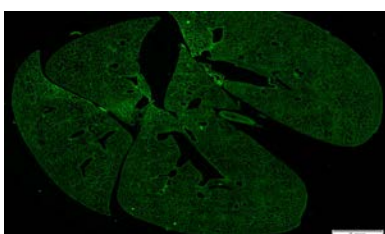

**Supplemental Figure 11. Low magnification immunofluorescent co-staining of BMP molecules.** Lungs from 8 and 20 week old mice (n=5 per condition / timepoint) were collected and paraffin embedded and subsequently immunostaining was performed to colocalize relevant molecules at 10x. Co-immunostaining is shown (A) Nog/aSMA and merged images, and (B) Hvj, Bmp2, and Bmpr2. Representative images.

COL4A1

ITGA2

Merged

TNF-  
8 week

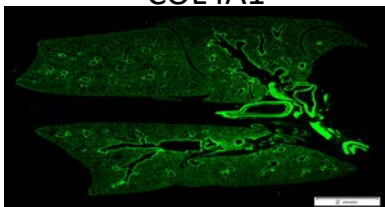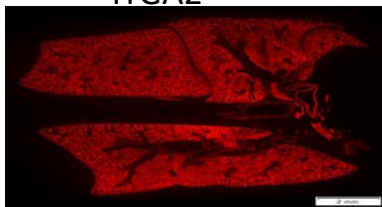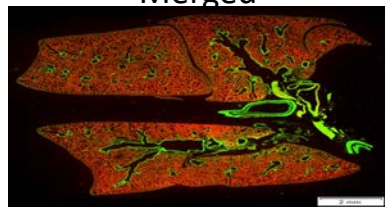

TNF+  
8 week

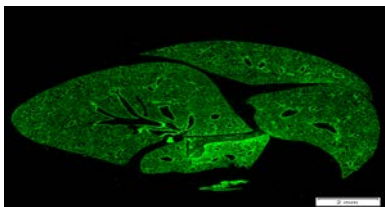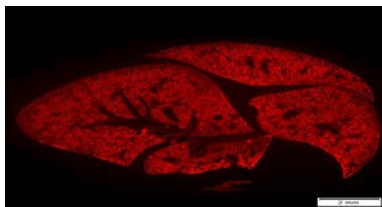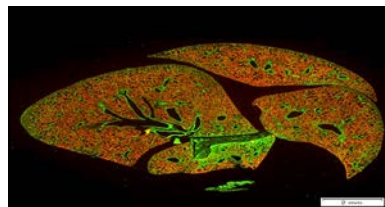

TNF-  
19 week

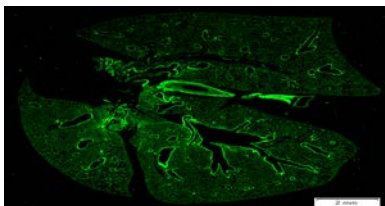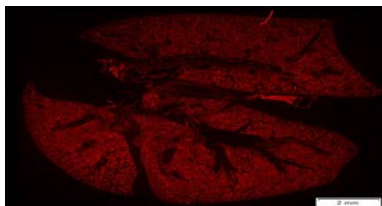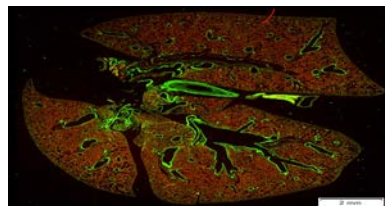

TNF+  
19 week

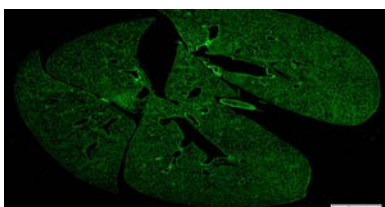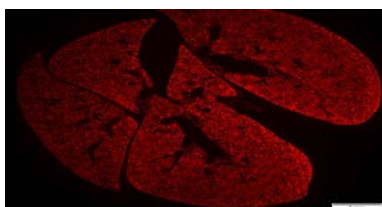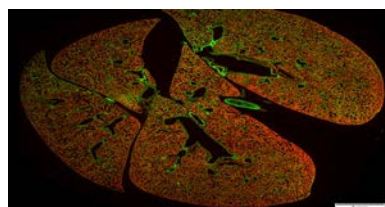

**Supplemental Figure 12. Low magnification immunofluorescent co-staining of Col4a1/Itga2.** Lungs from 8 and 20 week old mice (n=3-5 per condition / timepoint) were collected and paraffin embedded and subsequently immunostaining was performed to colocalize relevant molecules at 10x. Co-immunostaining is shown Col4a1/Itga2/Merge. Representative images.

A.

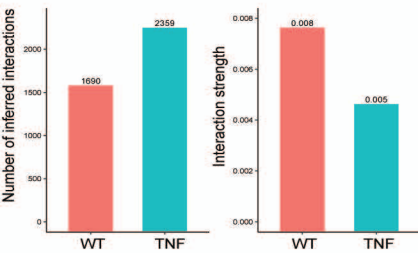

B.

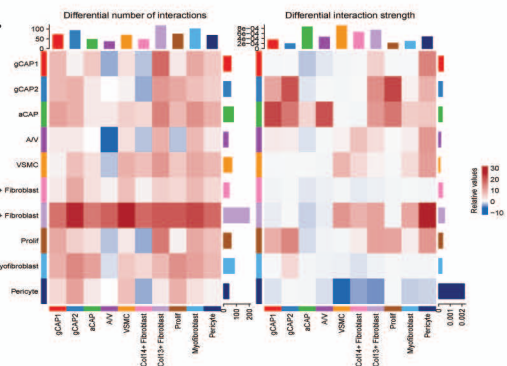

C.

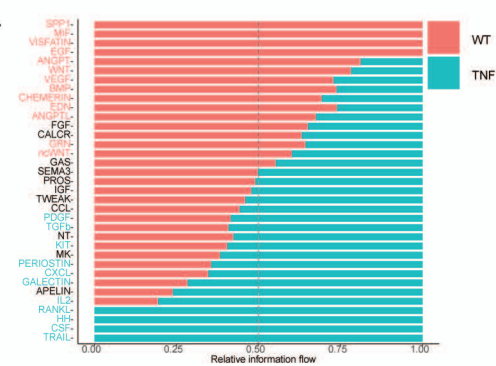

D.

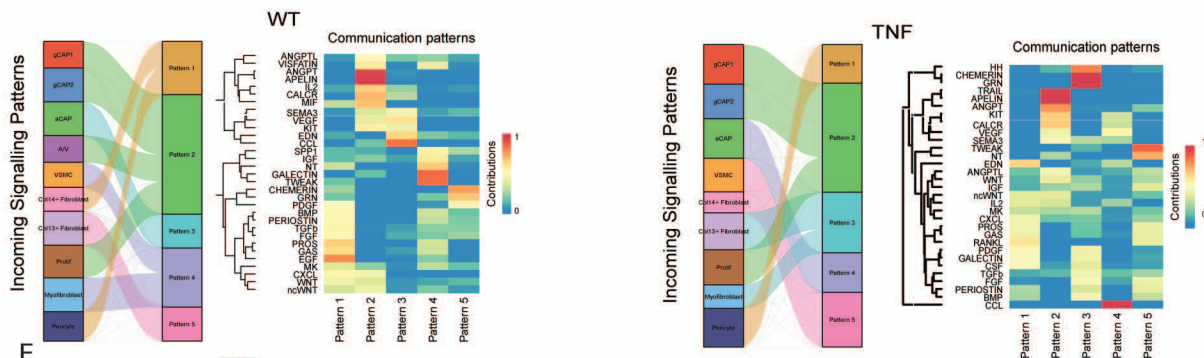

E.

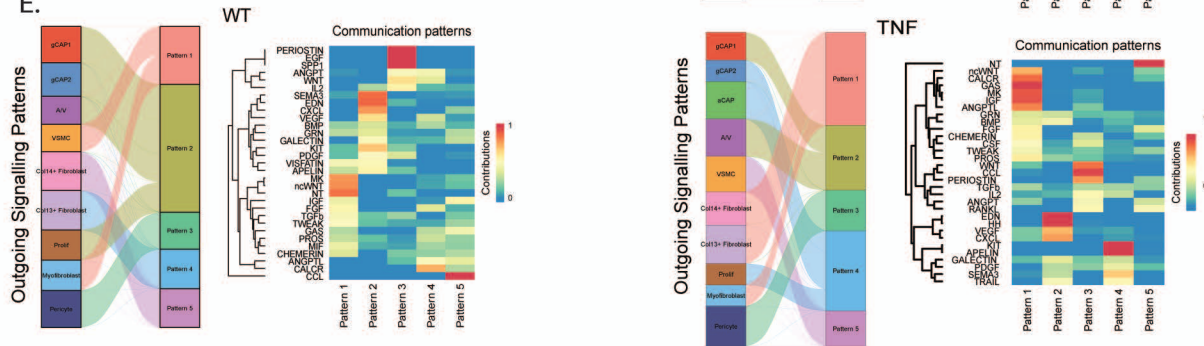

**Supplemental Figure 13. Network based analysis of perturbations in cell-cell communication in TNF mediated PH.** Cell-cell communication was investigated using Cellchat to assess global changes in cell signaling across cell types. A. Differential number and strength of cell-cell interactions in endothelial and mesenchymal cells across conditions. B. Heatmap of differential number of interactions and interaction strength across WT and TNF conditions for each cell type. The top colored bar plot represents the sum of column of values displayed in the heatmap (incoming signaling). The right colored bar plot represents the sum of row of values (outgoing signaling). In the central heatmap, red (or blue) represents increased (or decreased) signaling in the TNF condition compared to WT. C. Stacked bar plot indicating conserved and context-specific signaling pathways across WT and TNF conditions. Significant signaling pathways are ranked based on differences in the overall information flow within the inferred networks between WT and TNF lungs. The top signaling pathways colored red are enriched in WT, and those colored green are enriched in the TNF. Incoming (D.) and outgoing (E.) signaling patterns shared across cell types in WT (left) and TNF-Tg (right) conditions are visualized as both alluvial plots (left) and heatmaps (right) to indicated cell types and pathways which are differentially regulated by each cell signaling pattern.

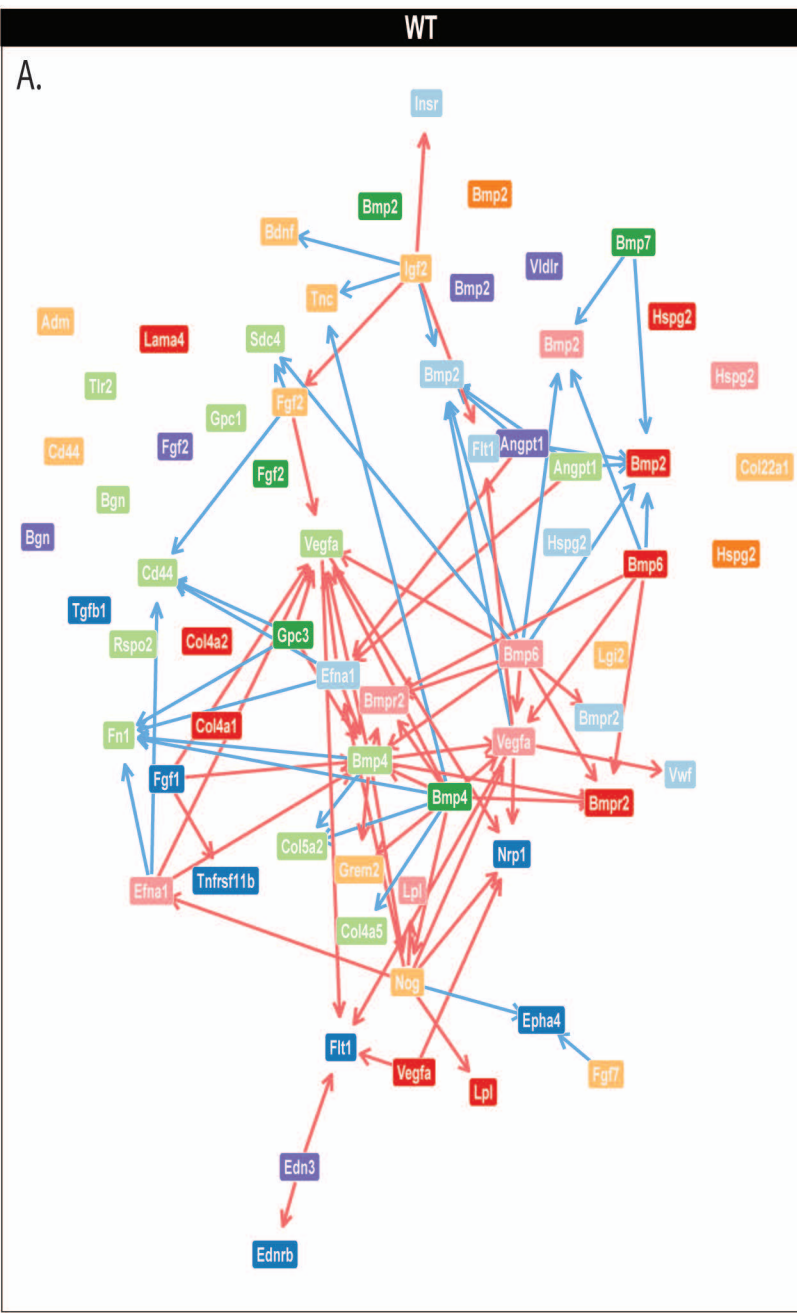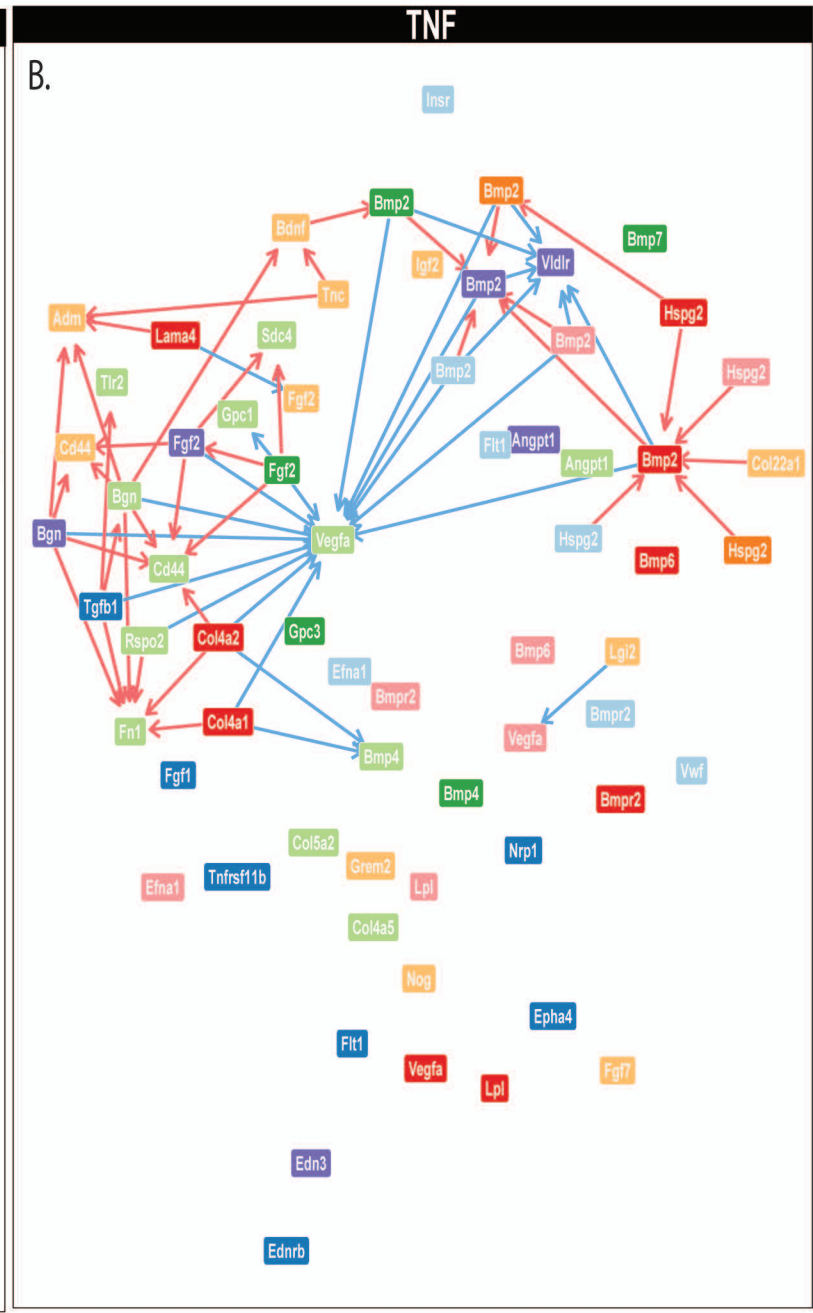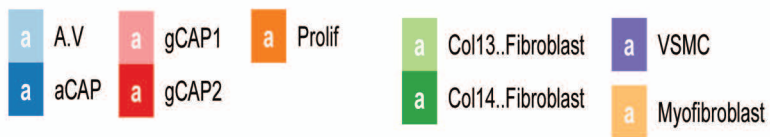

direction\_regulation

→ down

→ up

**Supplemental Figure 14. Intercellular regulatory network systems view of ligand-receptor interactions.**

A network analysis was generated using multinichenetR package to show the gene regulatory links between ligands from sender cell types to their induced ligands/receptors in receiver cell types in WT (left) and TNF (right) conditions. Lines show if the ligand/receptor in the receiver is a potential downstream target of the ligand based on literature/database knowledge and correlation in expression across samples.

NOG DAPI

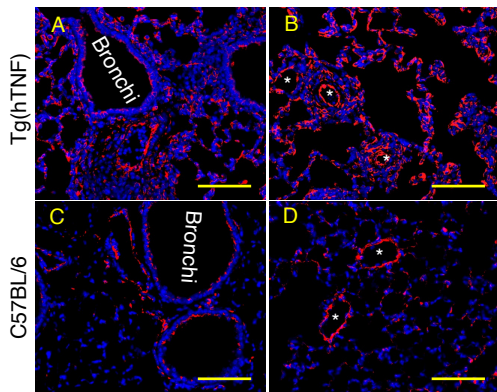

E

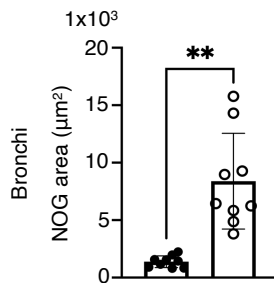

F

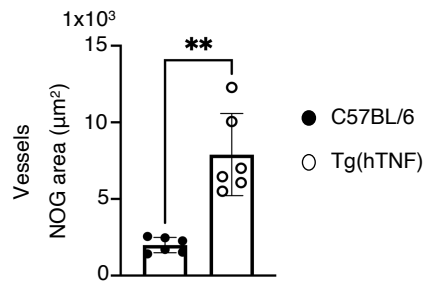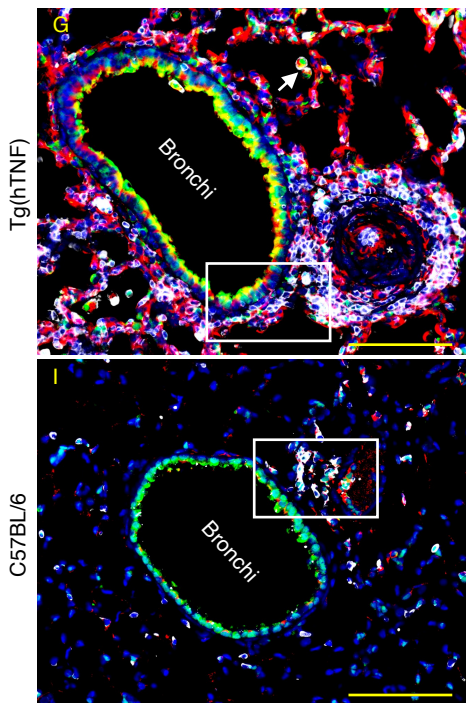

NOG BMP2 CD45 DAPI

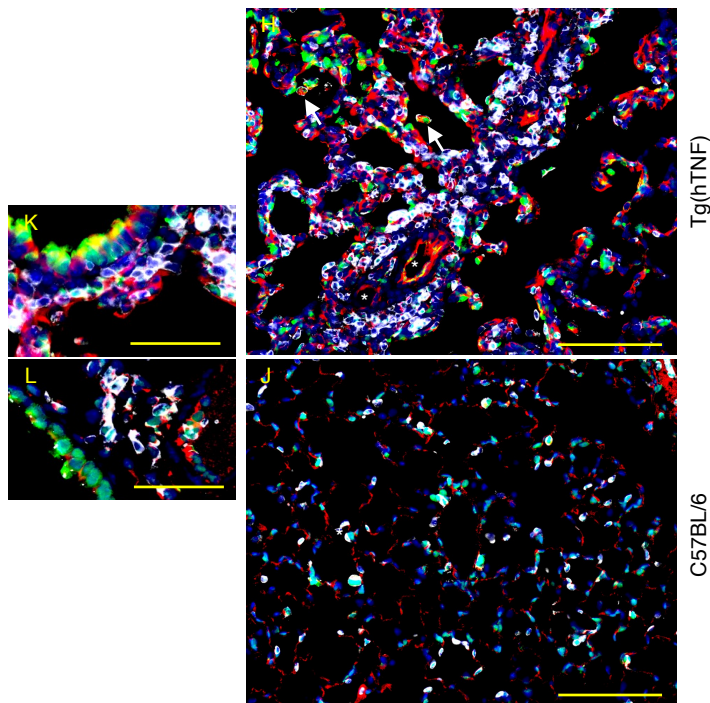

Tg(hTNF)

C57BL/6

● C57BL/6  
○ Tg(hTNF)

# Individual channels, A-D

Merge

DAPI

NOG

# Individual channels, G-J

Merge

DAPI

NOG

BMP2

CD45

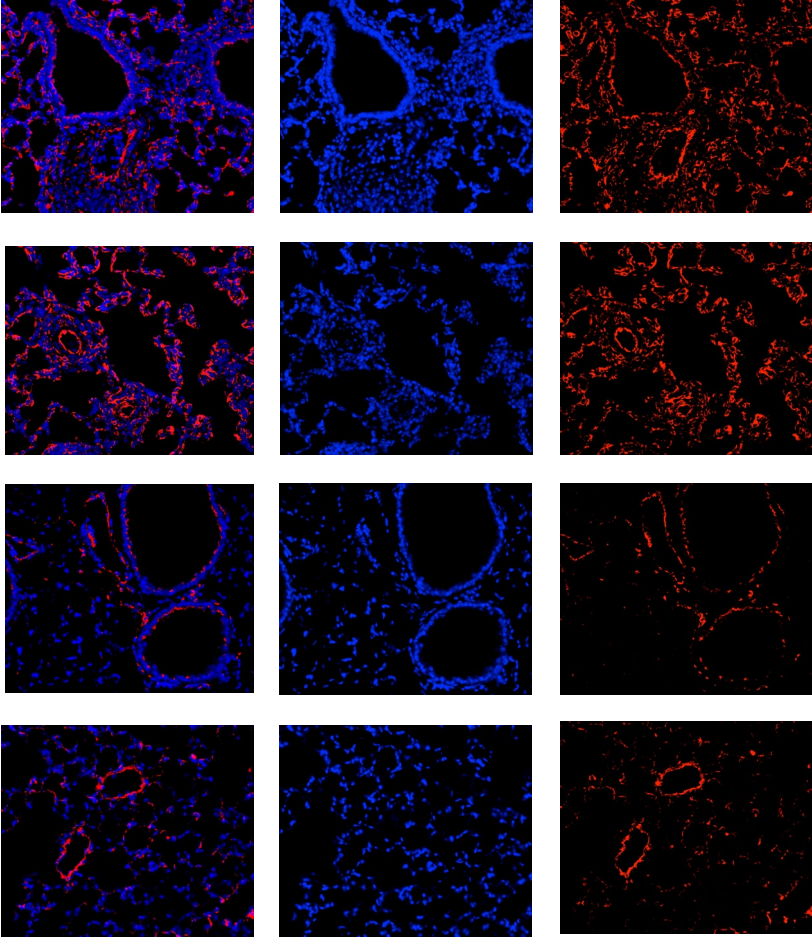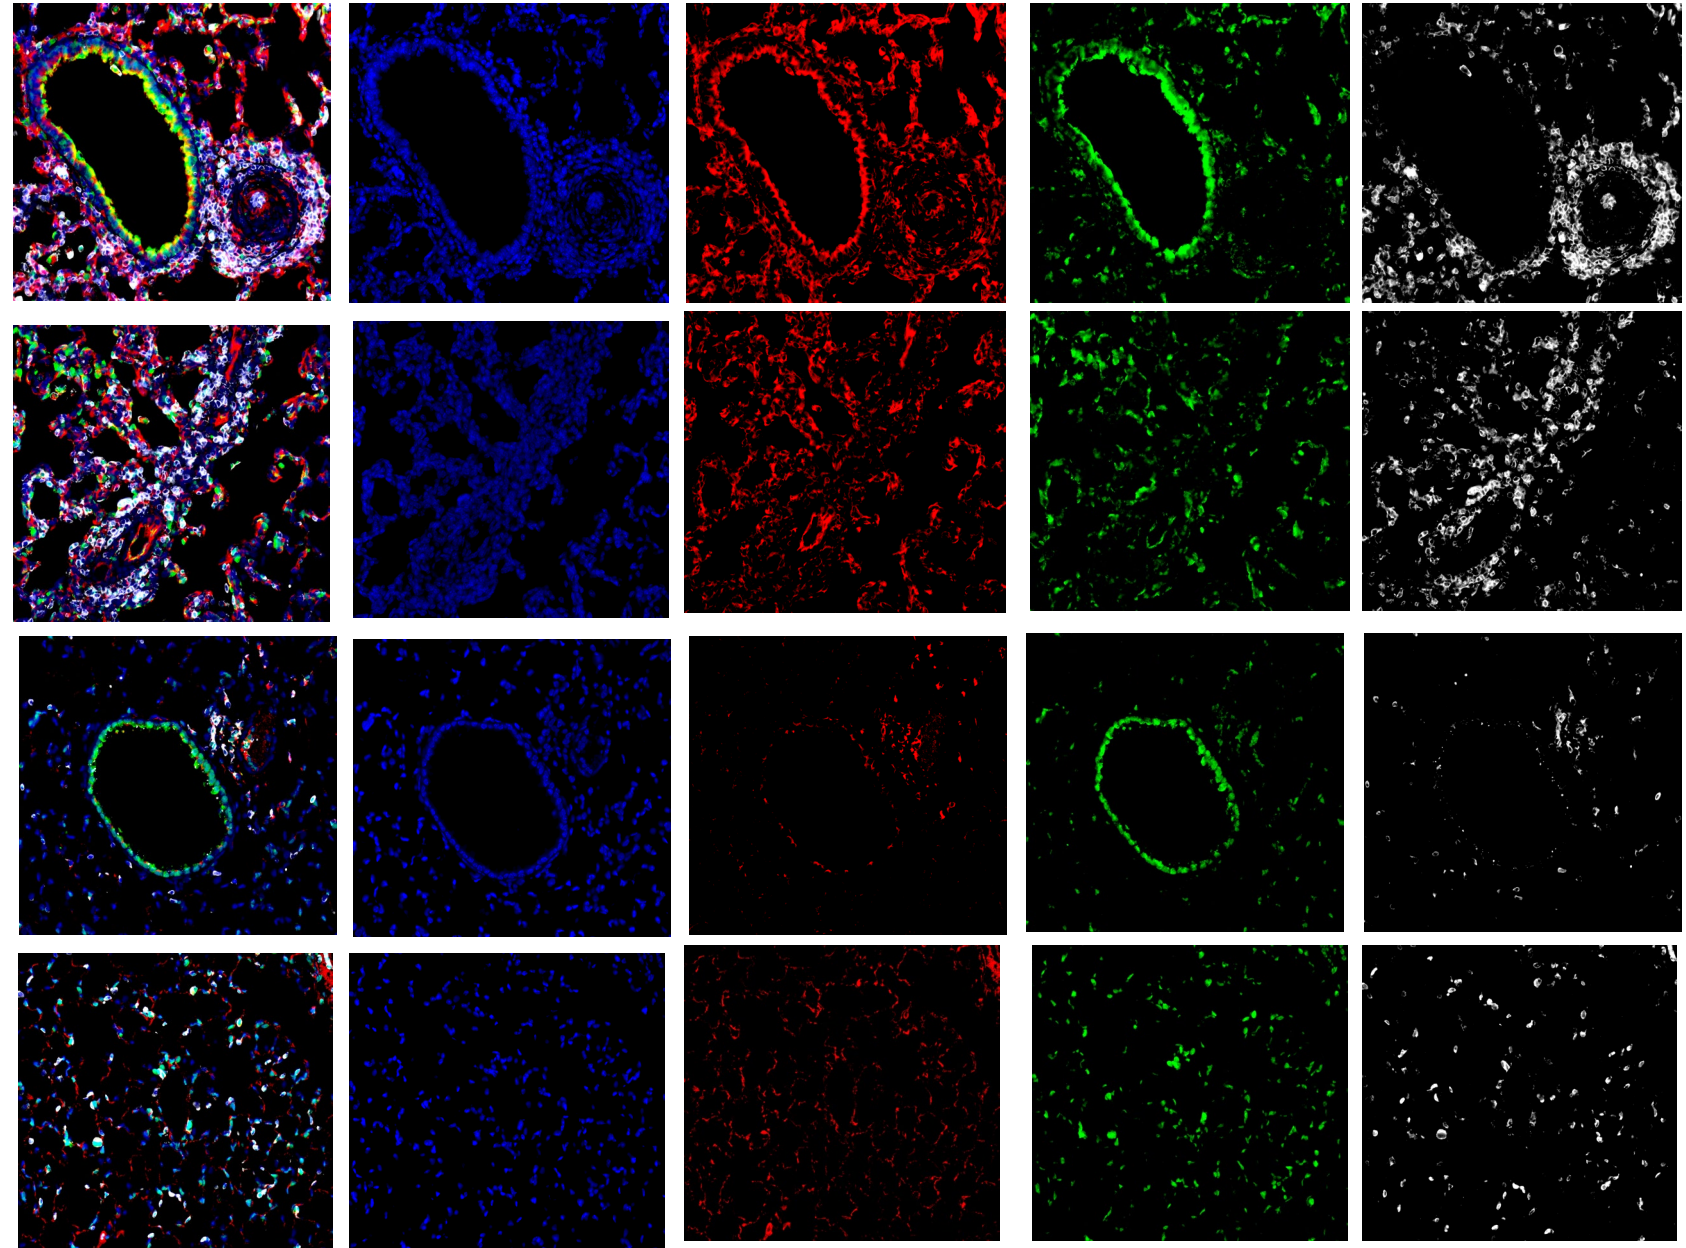

**Supplementary Fig 15. NOG is mainly expressed by CD45<sup>-</sup> stromal cells and increased in vascularized and bronchial areas in lungs of Tg(hTNF) mice.** Lungs from Tg(hTNF) and C57BL/6 mice were stained with antibodies specific for NOG and nuclei labeled with DAPI. NOG expression is increased in A) bronchial and B) vascularized areas in lungs from TNF Tg mice compared to NOG expression in C) bronchial and D) vascularized areas in lungs of C57BL/6 mice. Asterisks depict lumen of blood vessels. Scale bars = 100  $\mu$ m. 3 random 200x pictures were taken in bronchial and vascularized areas in the lungs of Tg(hTNF) ( n = 2-3, 6-9 pictures) and C57BL/6 mice ( n = 2-3, 6-9 pictures). Representative 200x pictures are shown. Area of NOG positive signal in 200x random fields was measured with NIH image J using identical settings. Area covered by NOG signal in E) bronchial and F) vascularized regions in the lungs of Tg(hTNF) mice is significantly bigger than areas of NOG signal in C57BL/6 mice. Graphs represent the mean  $\pm$  SEM. Statistical significance was calculated with paired two tailed Student's t test. \*\*,  $p \leq 0.005$ . Lung sections from G, H) TNF Tg and I, J) C57BL/6 mice were stained with antibodies against NOG, BMP2 and CD45. Nuclei were labeled with DAPI. NOG is expressed mainly by CD45<sup>-</sup> stromal cells. White arrows point to a few CD45<sup>+</sup>NOG<sup>+</sup> cells with macrophage like morphology in the alveolar spaces. Asterisks depict lumen of vessels and scale bars represent 100  $\mu$ m. Insets of K) Tg(hTNF) and L) C57BL/6 mice show the lack of colocalization between CD45 and NOG in peribronchial areas. Scale bars: 50  $\mu$ m. A second panel shows the individual channels for each image A-D and G-J

Proximal

Distal

Tg(hTNF)

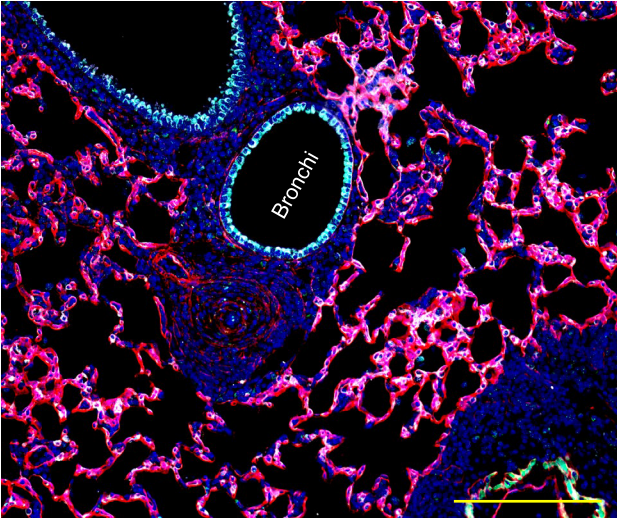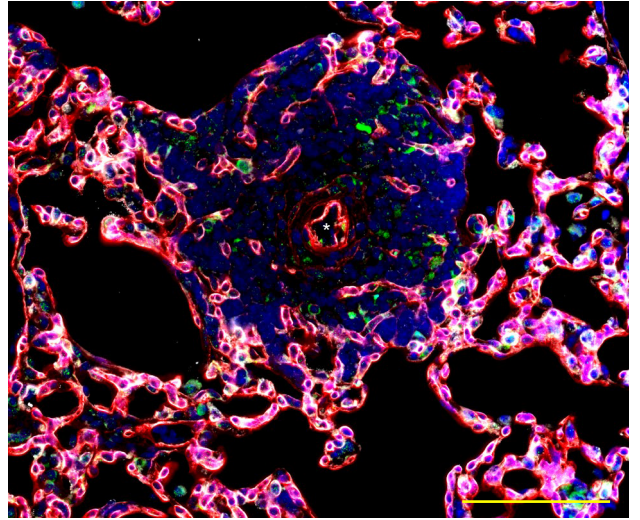

C57BL/6

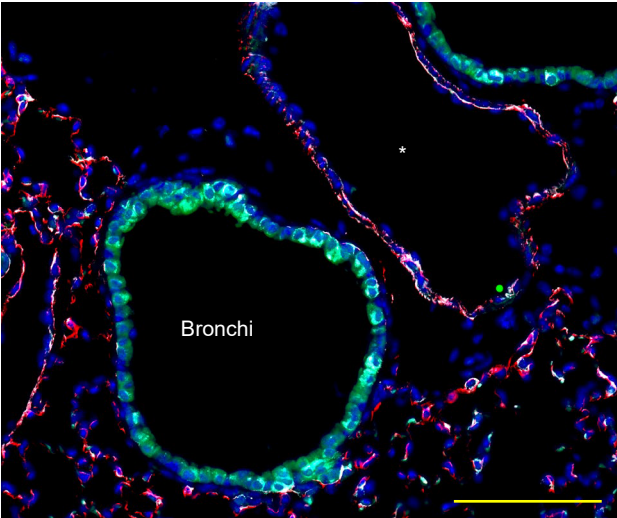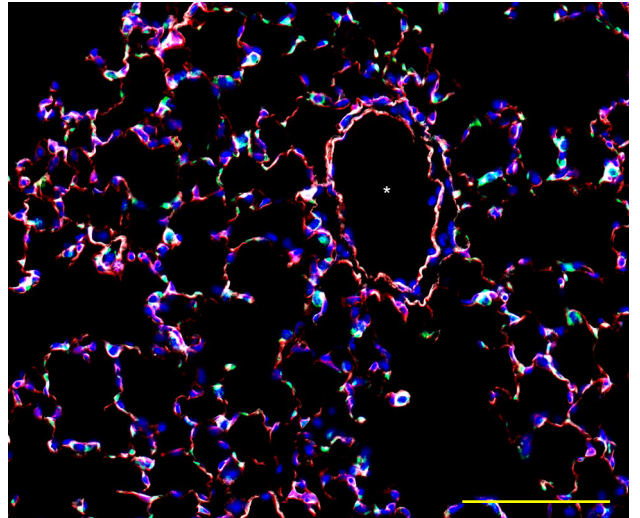

Collagen IV IGFBP7 ITAG DAPI

**Supplementary Fig 16. Hi resolution image of collagen IV staining.** Immunofluorescent co-staining of molecules Col4a1/Itga2/IGFBP7 staining. Colors are indicated in the inset titles above the images. Top rows for each stain indicate TNF mice and bottom rows WT mice. Images were taken at 20x magnification and represent central bronchiolar regions (left) and the lung periphery (right). Representative images.

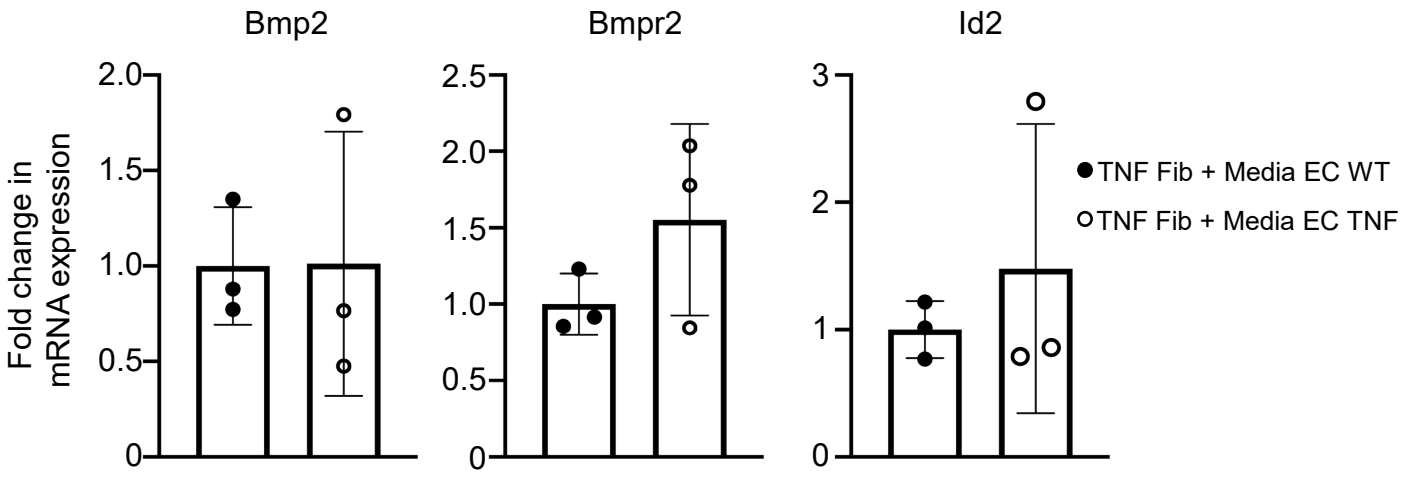

**Supplementary Fig 17. Media from endothelial cells of Tg(hTNF) does not alter BMP2-BMP2 axis.** Fibroblasts (FB) from Tg(hTNF) mice were cultured with media from endothelial cells (EC) from C57BL/6 (WT) or Tg(hTNF) mice activated with TNF for 72h. RNA was isolated from cocultures 6h later and cDNA prepared for qPCR. Gene expression was normalized to 18s and gene expression in different cultures was compared to FB from Tg(hTNF) mice stimulated with media from WT EC. A) BMP2, B) BMP2 and C) Id2 in TNF EC were not affected by media from TNF EC.

|             | Lung number (pooled) | Single cell of total cells | Viable cells of single cells (7-AAD-) | CD45+ (leukocytes) of Viable cells | CD326+ (epithelial cells) of Viable cells | CD45-/CD326- (non-epithelial non-leukocytes) cells of Viable cells | CD31- (non-endothelial cells) of CD45-/CD326- | CD31+ (endothelial cells) of CD45-/CD326- |
|-------------|----------------------|----------------------------|---------------------------------------|------------------------------------|-------------------------------------------|--------------------------------------------------------------------|-----------------------------------------------|-------------------------------------------|
| WT 8 week   | 3                    | 79.7 (119513)              | 92.1 (110086)                         | 26.3 (28928)                       | 9.11 (10032)                              | 67.1 (73852)                                                       | 59.4 (43886)                                  | 40.7 (30058)                              |
| TNF 8 week  | 3                    | 78.0 (116951)              | 83.6 (97739)                          | 63.9 (62469)                       | 11.4 (11145)                              | 30.7 (30012)                                                       | 75.4 (22764)                                  | 24.2 (7260)                               |
| WT 14 week  | 4                    | 79.8 (119640)              | 93.5 (111855)                         | 24.2 (27120)                       | 9.16 (10245)                              | 68.7 (76815)                                                       | 64.0 (49155)                                  | 36.0 (27840)                              |
| TNF 14 week | 4                    | 78.6 (117835)              | 82.3 (96928)                          | 79.0 (76530)                       | 7.48 (7255)                               | 17.2 (16645)                                                       | 84.3 (14040)                                  | 15.7 (2610)                               |
| WT 20 week  | 4                    | 89.3 (112419)              | 83.7 (88186)                          | 66.2 (58417)                       | 5.58 (4922)                               | 29.3 (25826)                                                       | 53.6 (13801)                                  | 46.4 (11870)                              |
| TNF 20 week | 5                    | 85.1 (121008)              | 81.8 (90456)                          | 89.3 (80736)                       | 4.74 (3836)                               | 7.47 (6760)                                                        | 87.6 (5923)                                   | 12.4 (840)                                |

**Supplemental table 1. Summary of FACS results.** Staining of single cells from lungs was performed for CD45, CD326, and CD31 and a live/dead stain. Cell proportions are reflected as percentage of gated cells per 150,000 cells counted.

|                          | WT 8wk | WT 14wk | WT 20wk | TNF 8wk | TNF 14wk | TNF 20wk | Total |
|--------------------------|--------|---------|---------|---------|----------|----------|-------|
| <b>gCAP1</b>             | 2271   | 2383    | 2827    | 2993    | 2279     | 2040     | 14793 |
| <b>gCAP2</b>             | 2121   | 1680    | 2087    | 1191    | 913      | 673      | 8665  |
| <b>aCAP</b>              | 914    | 736     | 778     | 808     | 680      | 541      | 4457  |
| <b>A/V</b>               | 466    | 488     | 578     | 464     | 267      | 529      | 2792  |
| <b>VSMC</b>              | 126    | 82      | 134     | 217     | 450      | 356      | 1365  |
| <b>Col14+ Fibroblast</b> | 128    | 106     | 105     | 125     | 226      | 447      | 1137  |
| <b>Col13+ Fibroblast</b> | 482    | 257     | 203     | 53      | 57       | 58       | 1110  |
| <b>Prolif</b>            | 45     | 14      | 44      | 439     | 284      | 164      | 990   |
| <b>Myofibroblast</b>     | 229    | 154     | 230     | 79      | 56       | 78       | 826   |
| <b>Epithelial</b>        | 63     | 134     | 65      | 20      | 447      | 45       | 774   |
| <b>Mesothelial</b>       | 30     | 77      | 51      | 36      | 124      | 324      | 642   |
| <b>Lymphoid</b>          | 15     | 10      | 6       | 5       | 14       | 538      | 588   |
| <b>Lyz2+ Myeloid</b>     | 2      | 1       | 8       | 27      | 60       | 380      | 478   |
| <b>PF4+ Myeloid</b>      | 46     | 21      | 25      | 68      | 77       | 122      | 359   |
| <b>Pericyte</b>          | 66     | 57      | 60      | 23      | 2        | 0        | 208   |
|                          |        |         |         |         |          |          |       |
| <b>Total</b>             | 7004   | 6200    | 7201    | 6548    | 5936     | 6295     | 39184 |

**Supplemental table 2. Number of cells per UMAP cluster across conditions.** Total number of cells sequenced per condition is enumerated as a sum in the bottom row, cell types are listed in order of frequency across all conditions.

|                      | gCAP1          | gCAP2          | A/V            | aCAP           | Prolif         | VSMC           | Col14+ F       | Col13+ F       | Myofib         | Pericyte       |
|----------------------|----------------|----------------|----------------|----------------|----------------|----------------|----------------|----------------|----------------|----------------|
| FADD/TRADD apoptosis | <b>6.6E-03</b> | 3.5E-01        | <b>5.3E-04</b> | <b>1.8E-03</b> | <b>4.5E-02</b> | <b>2.0E-03</b> | <b>3.5E-02</b> | <b>1.1E-03</b> | <b>1.3E-03</b> | <b>7.3E-05</b> |
| RIP3K necroptosis    | <b>2.8E-02</b> | <b>4.1E-02</b> | <b>2.7E-02</b> | 1.0E-01        | 2.6E-01        | 6.7E-02        | 9.4E-01        | <b>1.1E-02</b> | <b>2.0E-02</b> | 3.9E-01        |
| PI3 kinase           | <b>1.8E-02</b> | <b>3.4E-02</b> | <b>1.2E-03</b> | <b>6.3E-05</b> | <b>1.6E-02</b> | <b>2.9E-02</b> | 1.2E-01        | 8.1E-02        | <b>1.3E-02</b> | 5.2E-02        |
| MAP3K                | <b>4.8E-02</b> | 9.5E-01        | 4.7E-01        | 2.3E-01        | 8.5E-01        | 3.9E-01        | 1.8E-01        | 1.2E-01        | <b>2.4E-02</b> | 9.4E-01        |
| JAK-STAT             | 8.3E-01        | 1.4E-01        | <b>4.5E-02</b> | <b>3.7E-04</b> | 4.4E-01        | 6.1E-02        | 7.8E-01        | 5.5E-02        | <b>2.9E-02</b> | 7.0E-01        |
| NFkB                 | 9.8E-01        | <b>2.9E-02</b> | 6.2E-01        | <b>4.0E-04</b> | 1.4E-01        | <b>3.6E-02</b> | 4.5E-01        | 3.2E-01        | <b>5.0E-02</b> | 1.7E-01        |
| p38-ERK              | <b>6.1E-04</b> | 6.8E-02        | <b>1.8E-02</b> | 2.3E-01        | <b>4.9E-02</b> | <b>2.5E-02</b> | <b>1.1E-02</b> | <b>2.9E-03</b> | 5.4E-01        | 1.3E-01        |

**Supplemental table 3. Cell-specific analysis of KEGG pathways downstream of TNF.** Annotations are listed in scientific notation and indicate p-values for the likelihood of pathway over-representation in the particular cell population,  $p < 0.05$  is bolded.
